# Supplementary material for: Simultaneous targeting of HER family pro-survival signaling with Pan-HER antibody mixture is highly effective in TNBC: a preclinical trial with PDXs
Source: PubMed Central journal article supplement (PMC7227035; doi:10.1186/s13058-020-01280-z), 2020-05-15

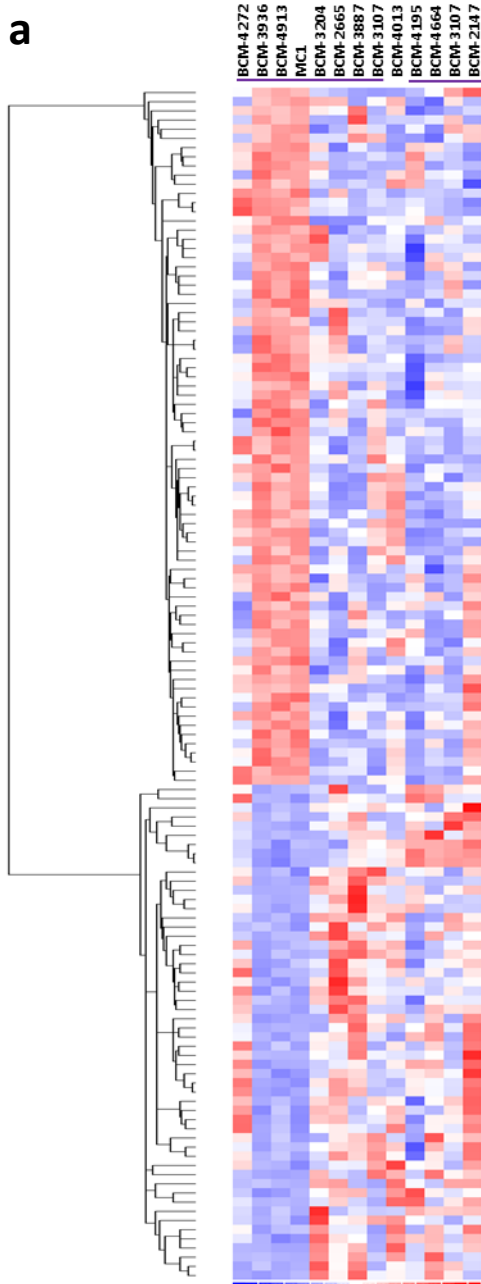

**b**

**Top Canonical Pathways**

| Name                                              | p-value  | Overlap     |
|---------------------------------------------------|----------|-------------|
| PTEN Signaling                                    | 3.37E-03 | 3.4 % 4/117 |
| Epithelial Adherens Junction Signaling            | 6.51E-03 | 2.8 % 4/141 |
| Neuregulin Signaling                              | 1.02E-02 | 3.5 % 3/85  |
| Formaldehyde Oxidation II (Glutathione-dependent) | 1.05E-02 | 50.0 % 1/2  |
| FAK Signaling                                     | 1.05E-02 | 3.5 % 3/86  |

**Top Molecules**

**Fold Change up-regulated**

| Molecules | Exp. Value |
|-----------|------------|
| PYGL      | ↑ 3.300    |
| GALNT7*   | ↑ 3.070    |
| NRAS      | ↑ 2.940    |
| SVIL      | ↑ 2.590    |
| CMTM3     | ↑ 2.530    |
| METTL21A  | ↑ 2.450    |
| ID2       | ↑ 2.440    |
| PTK2      | ↑ 2.380    |
| LGMN      | ↑ 2.230    |
| RNF144B   | ↑ 2.180    |

**Fold Change down-regulated**

| Molecules | Exp. Value |
|-----------|------------|
| HOXB13    | ↓ -27.580  |
| PTEN*     | ↓ -20.330  |
| PARP11    | ↓ -16.470  |
| PAG1      | ↓ -10.560  |
| TOX       | ↓ -10.170  |
| NRGN      | ↓ -9.320   |
| MAP9      | ↓ -6.290   |
| FXVD6     | ↓ -5.820   |
| SLC7A11*  | ↓ -5.760   |
| TRIQQ     | ↓ -5.680   |

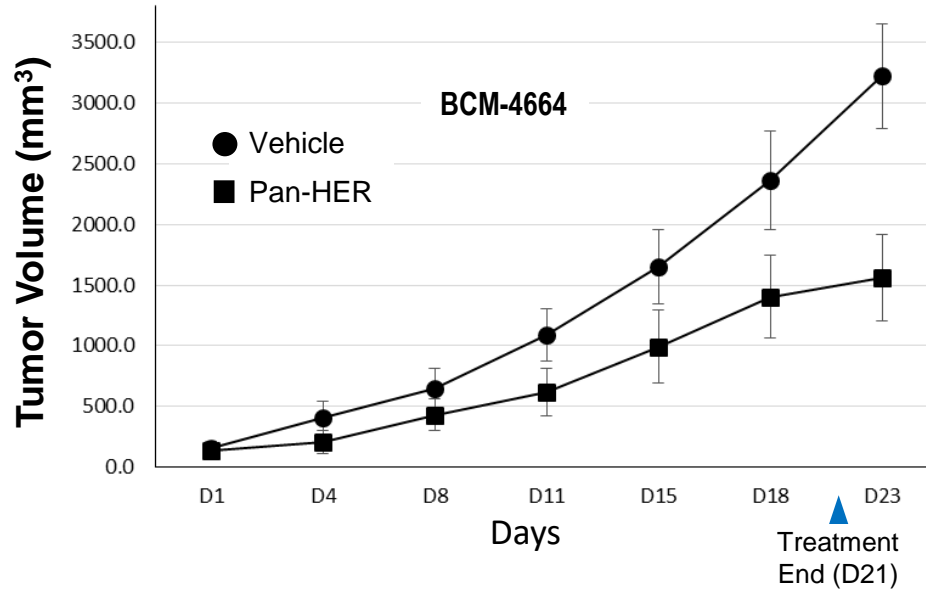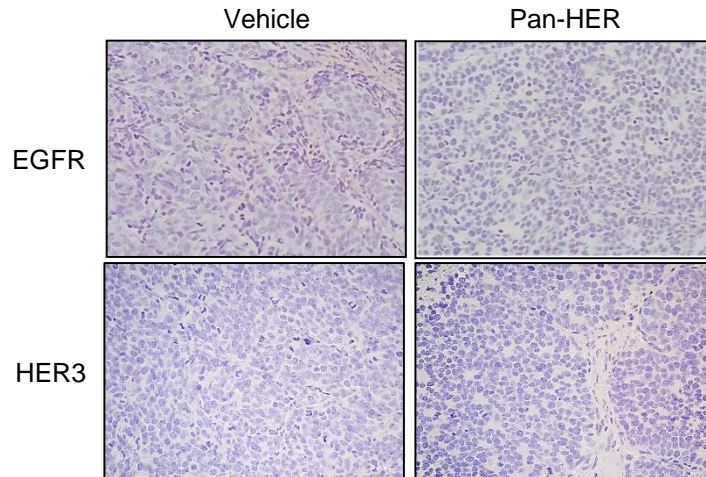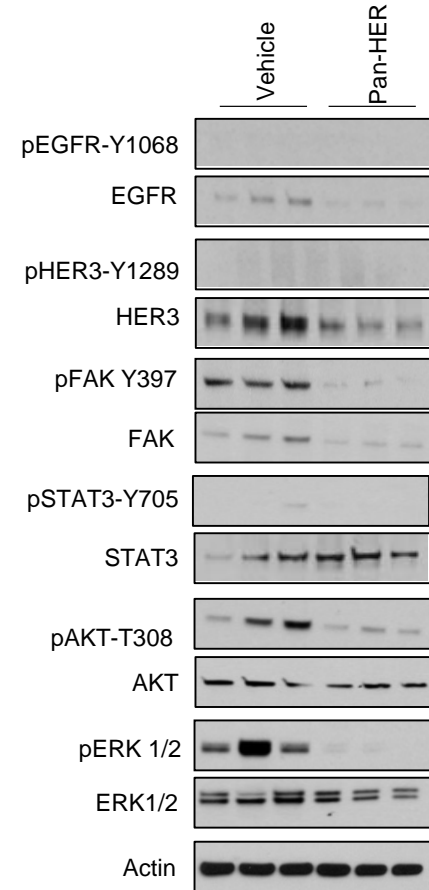

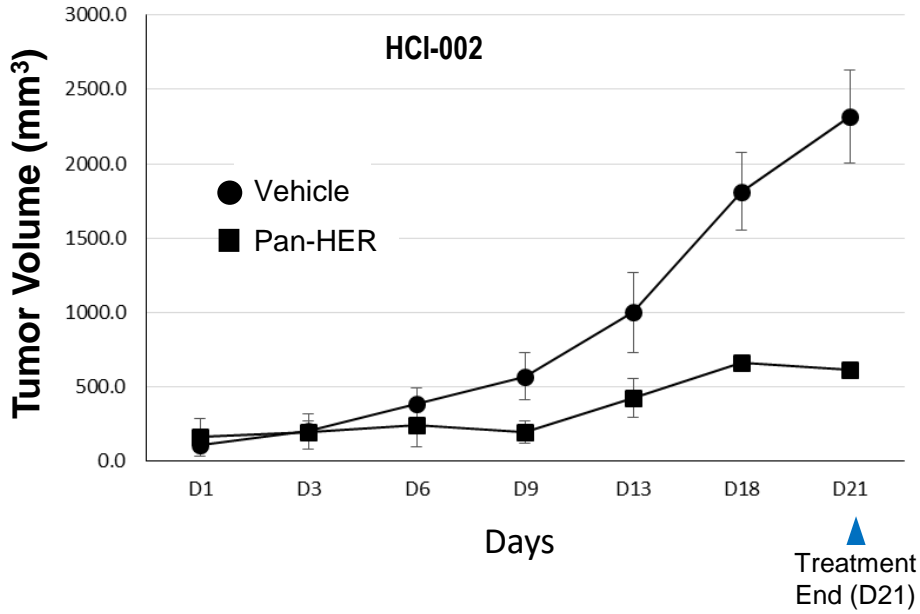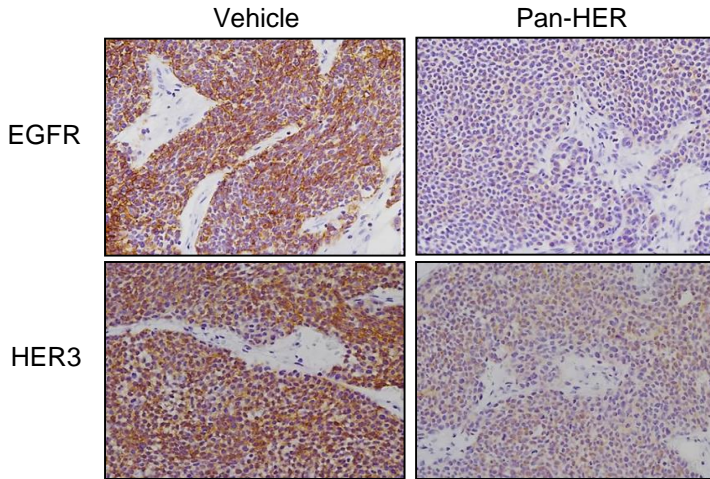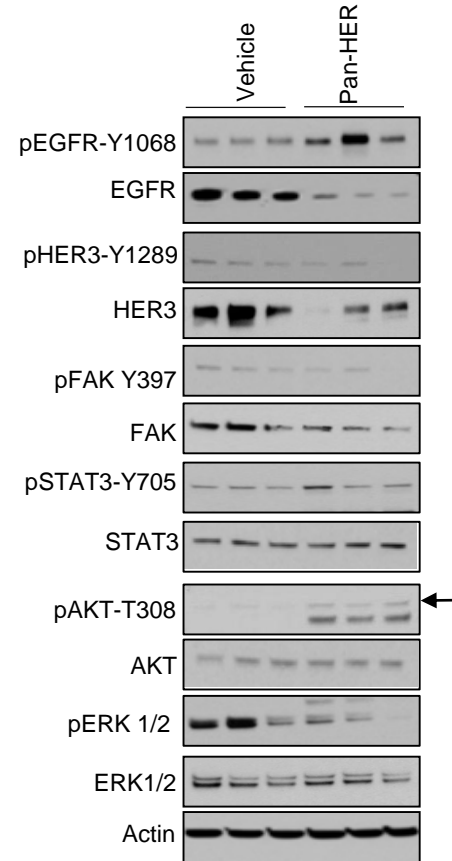

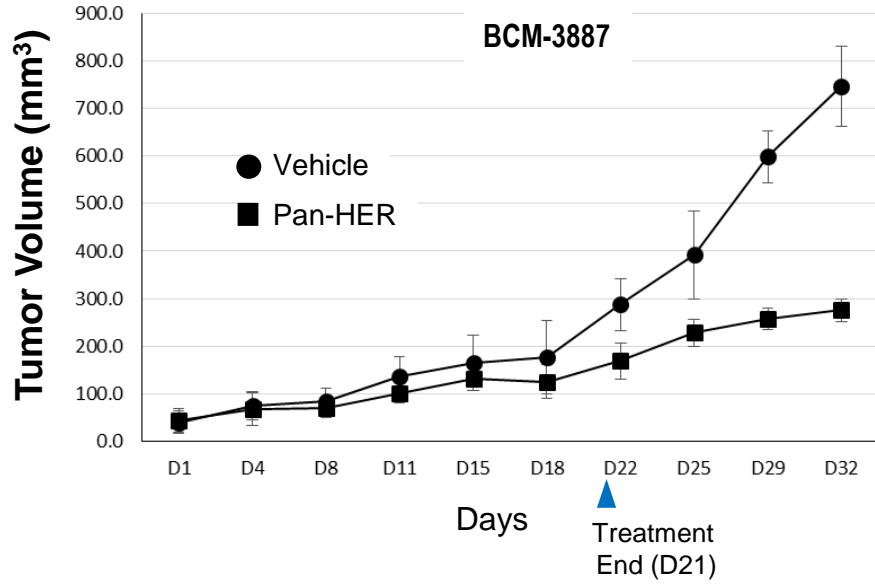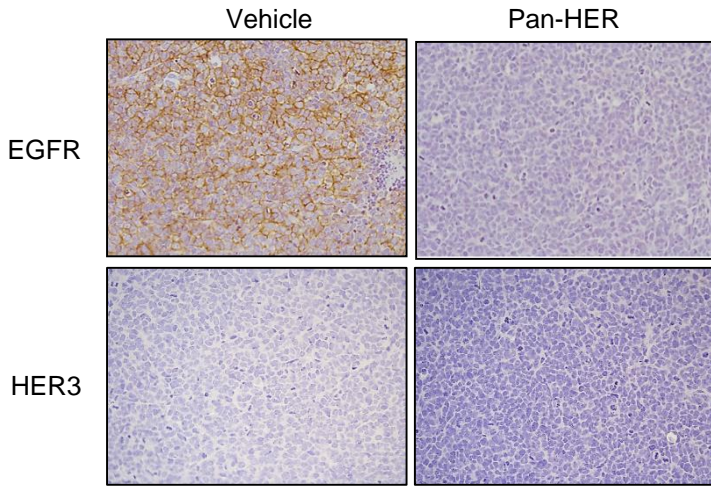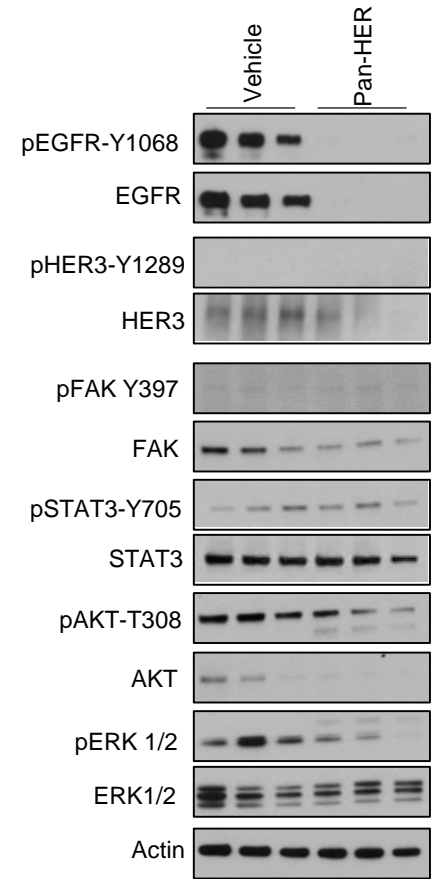

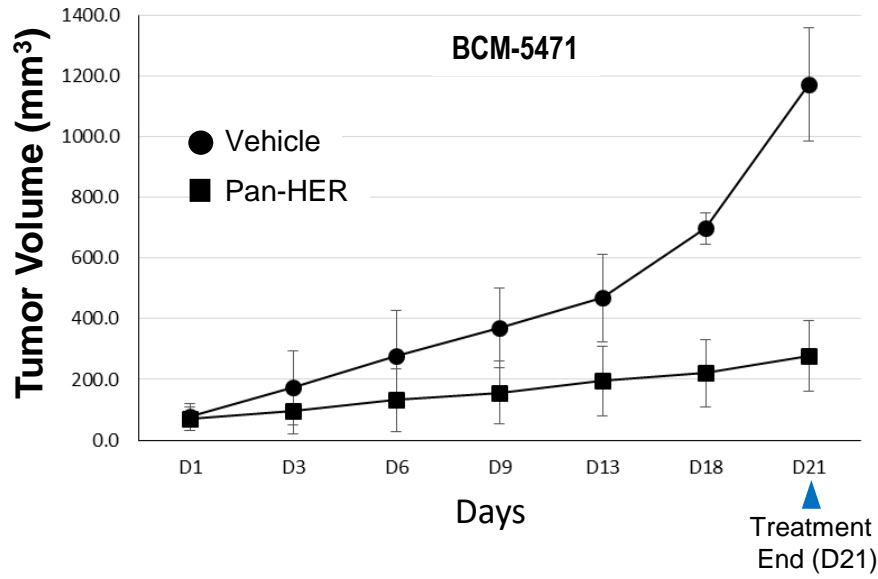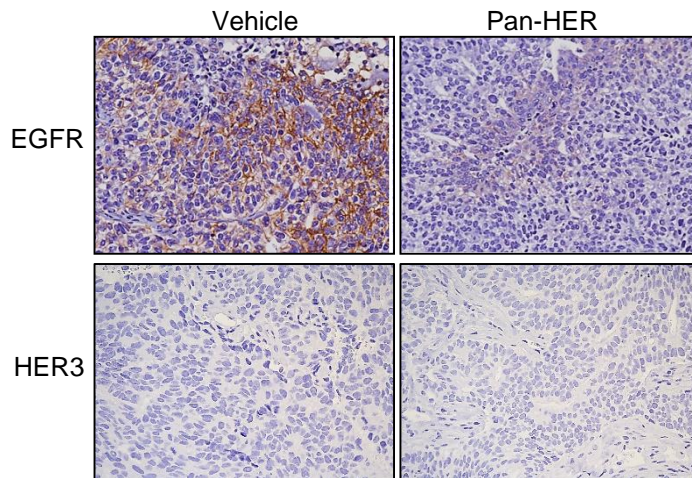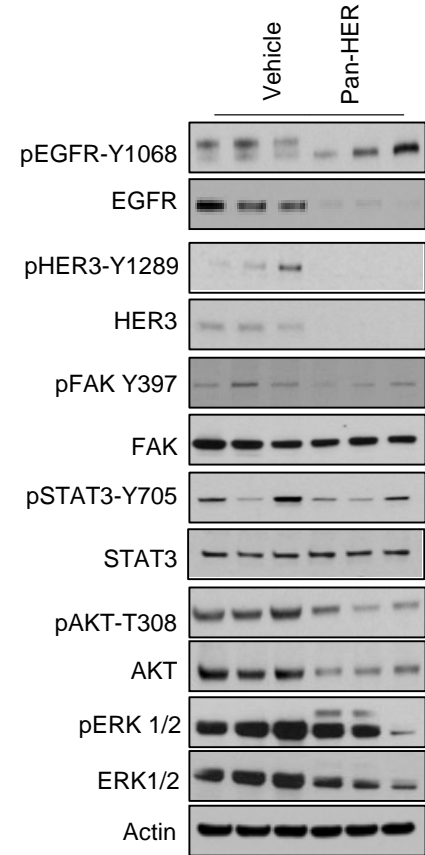



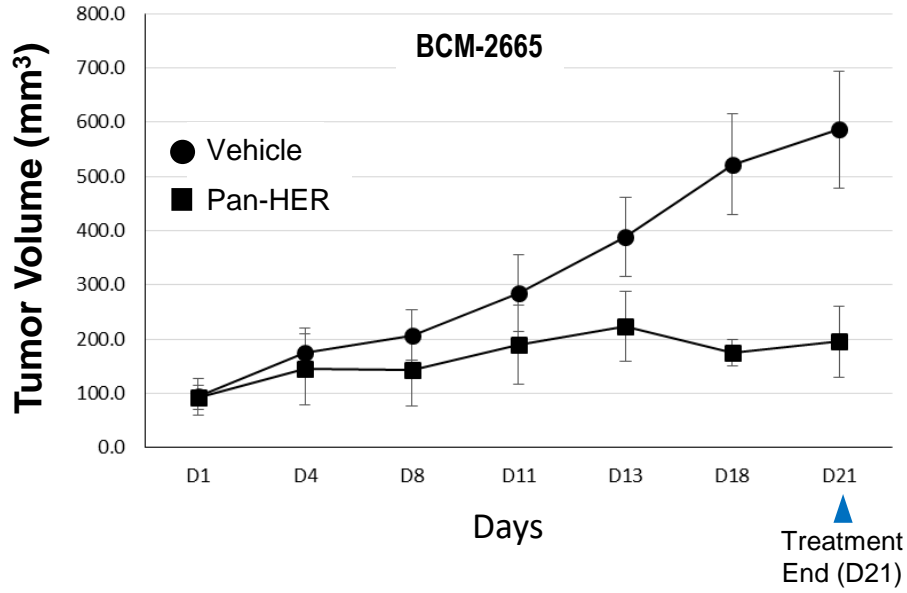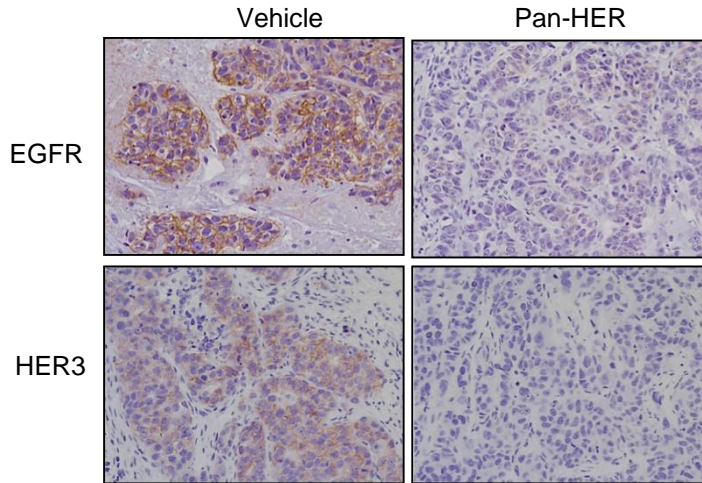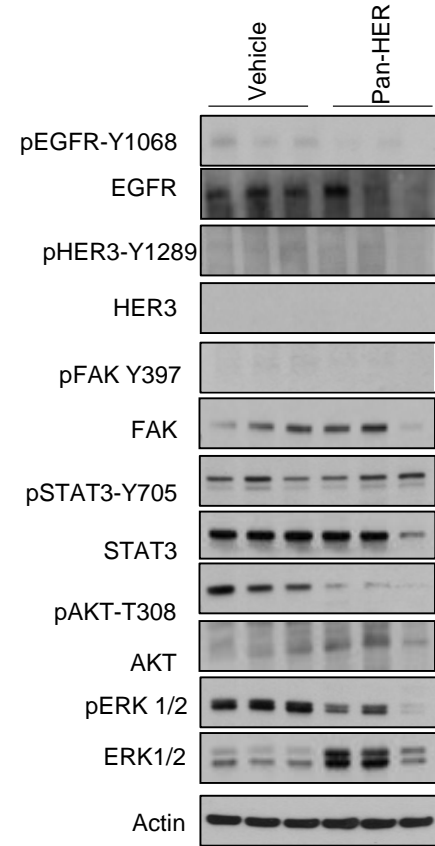

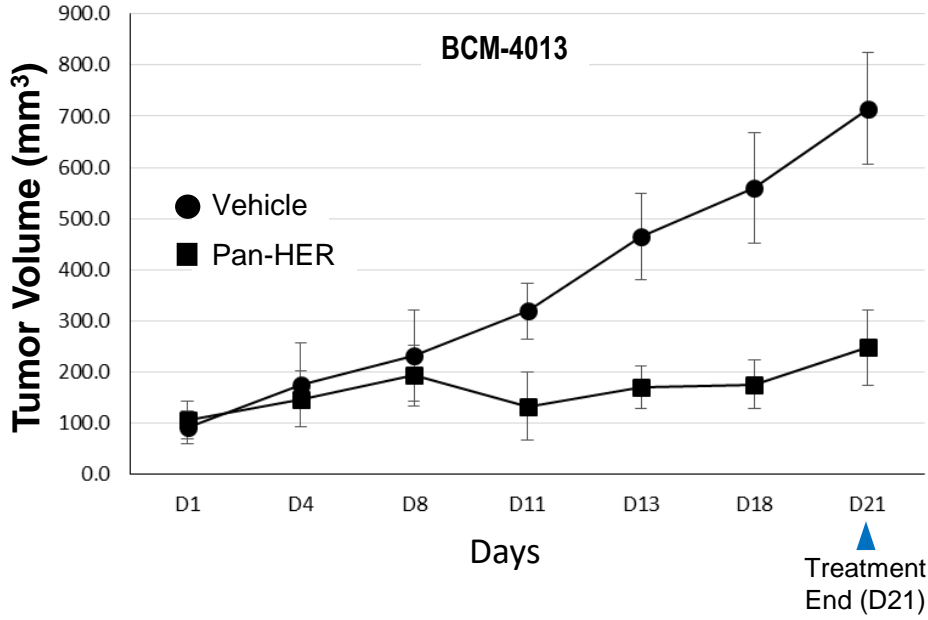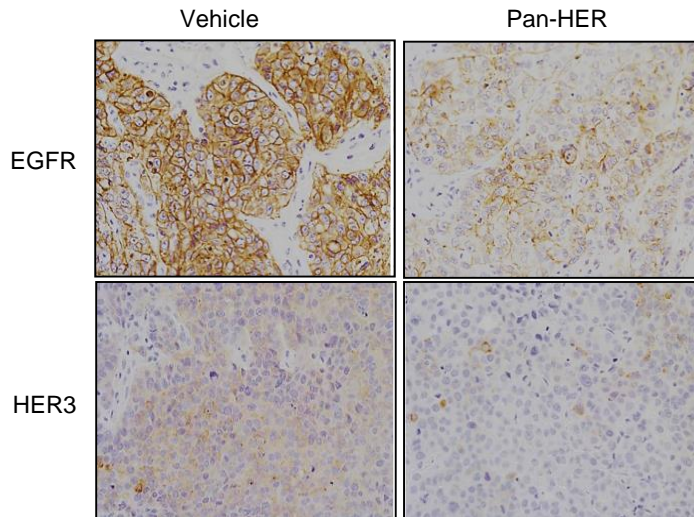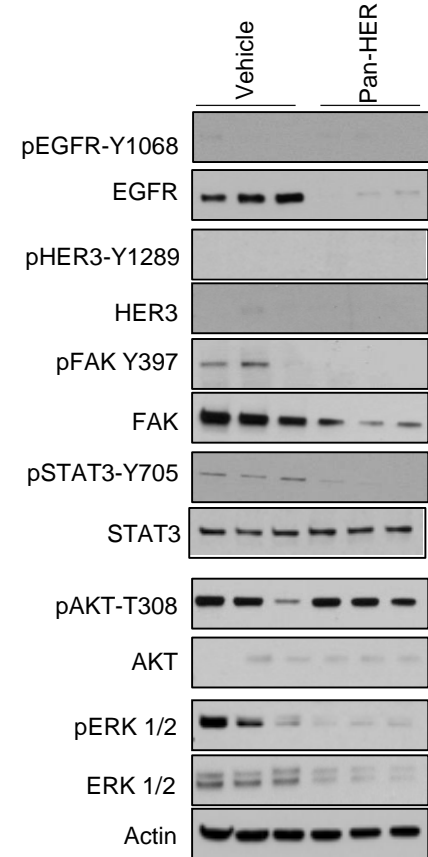

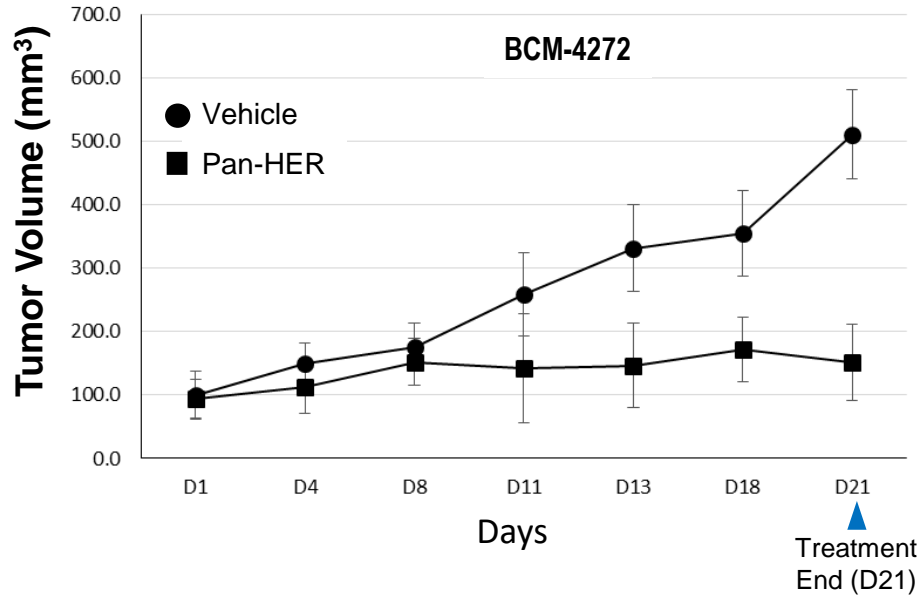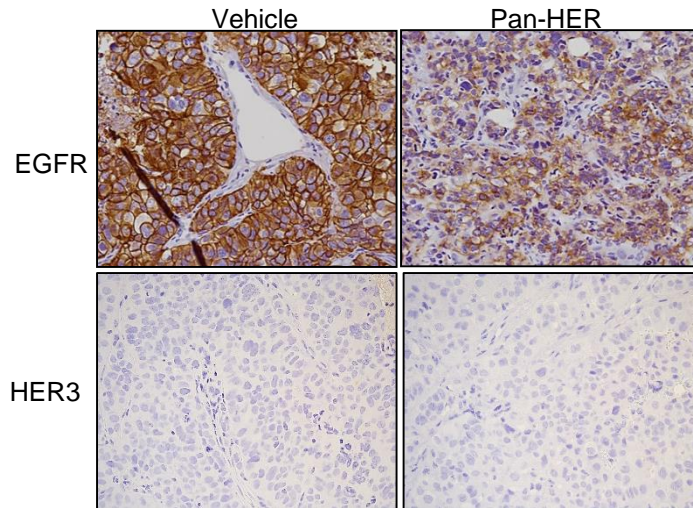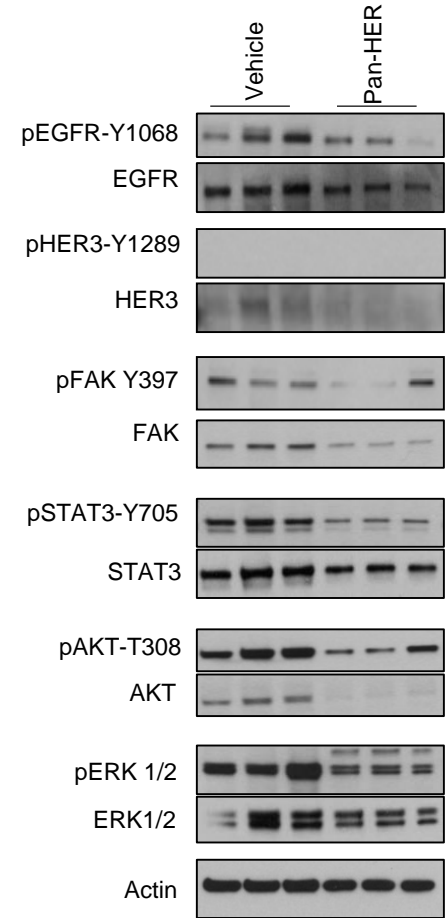



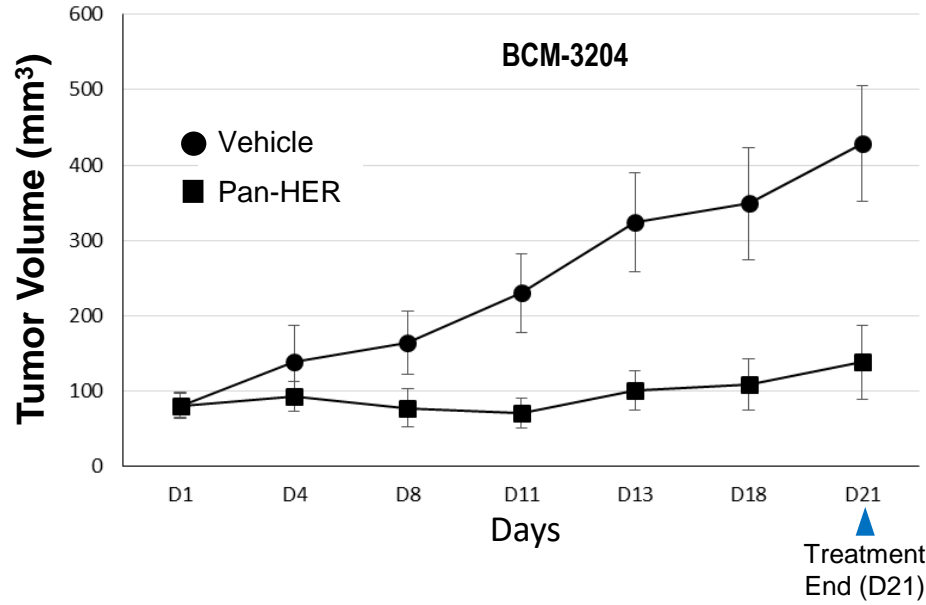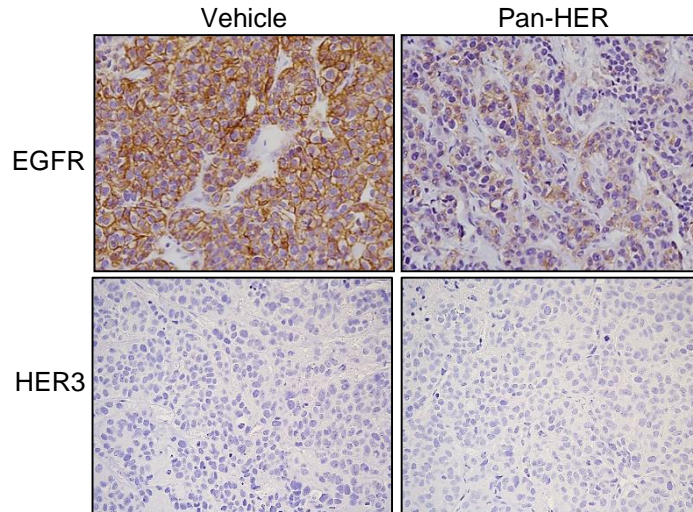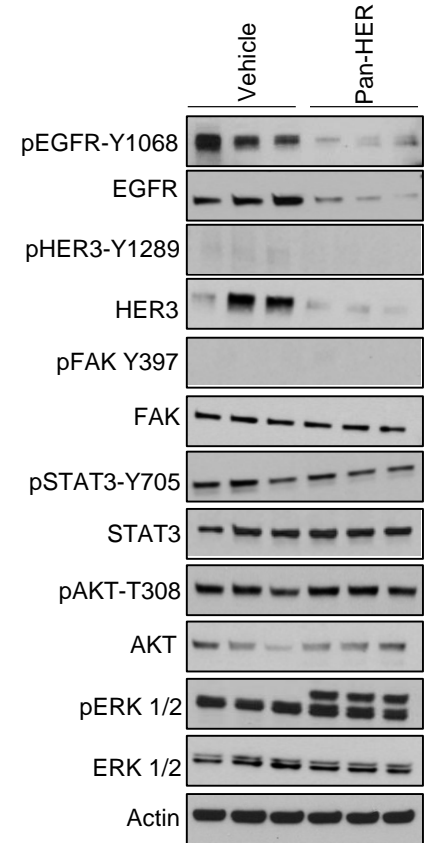

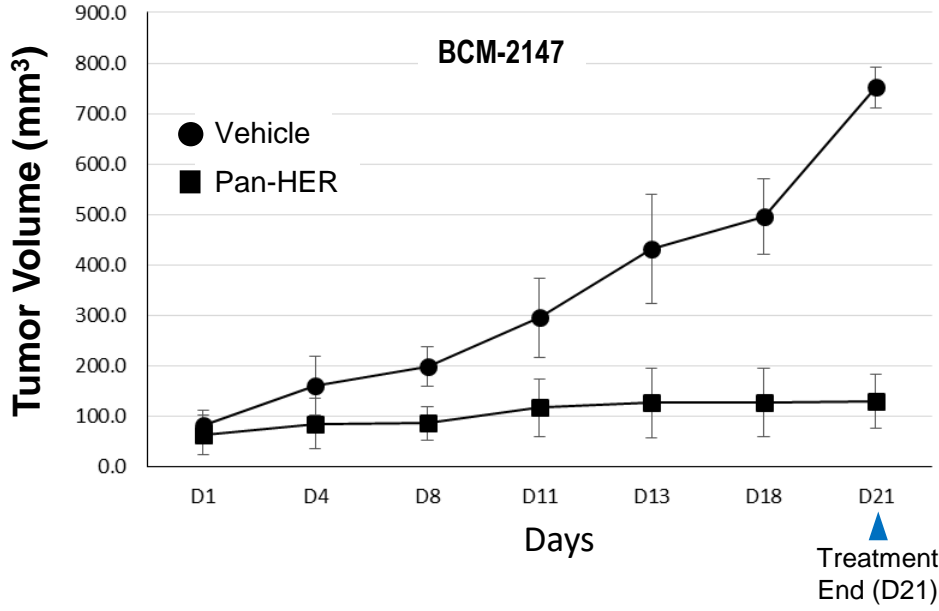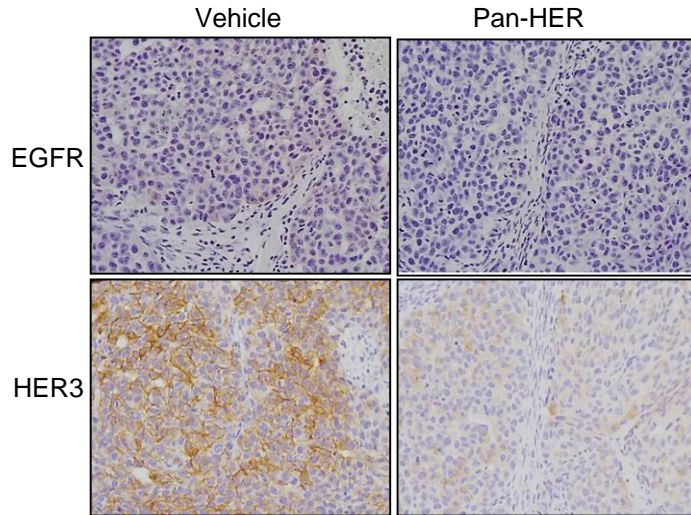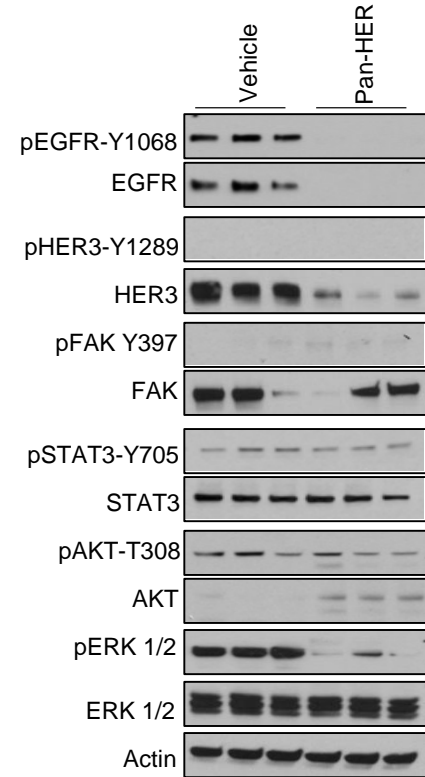

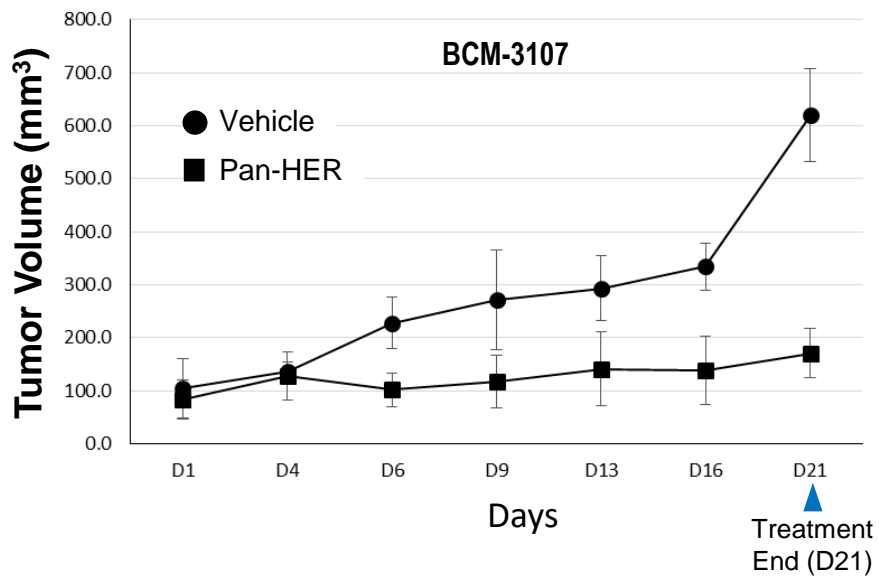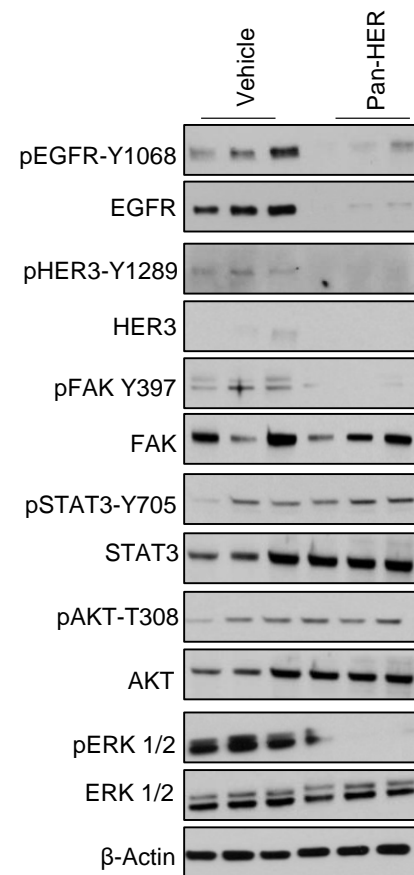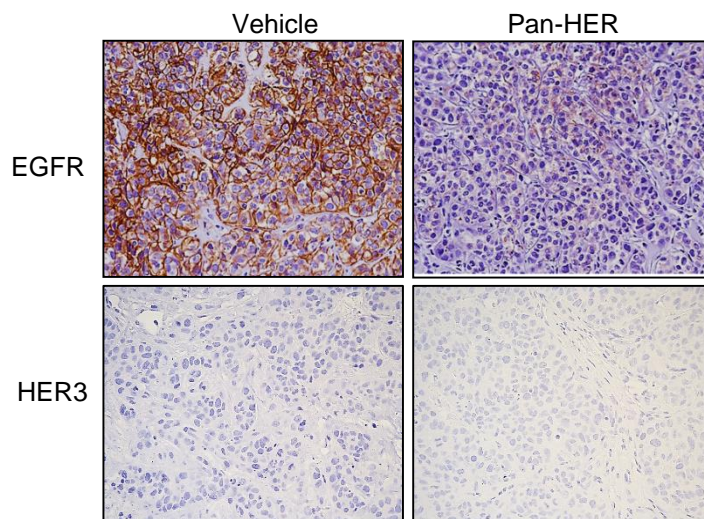

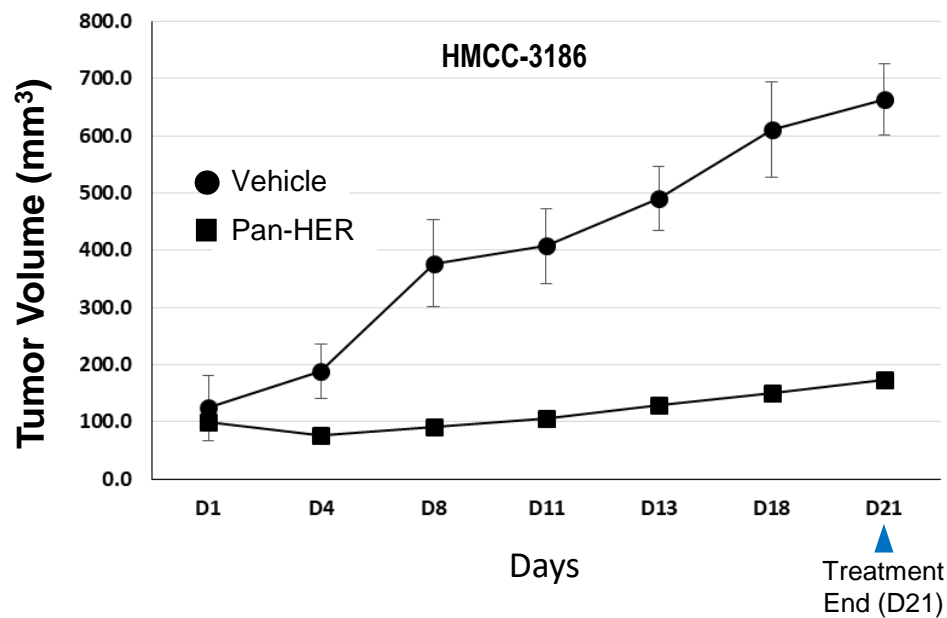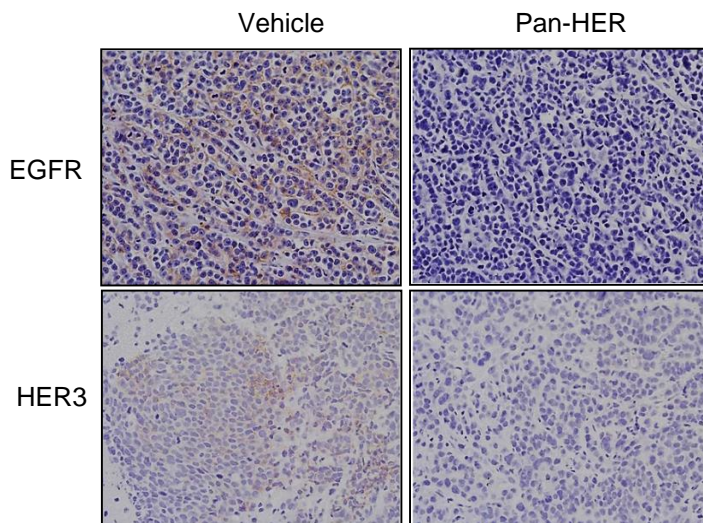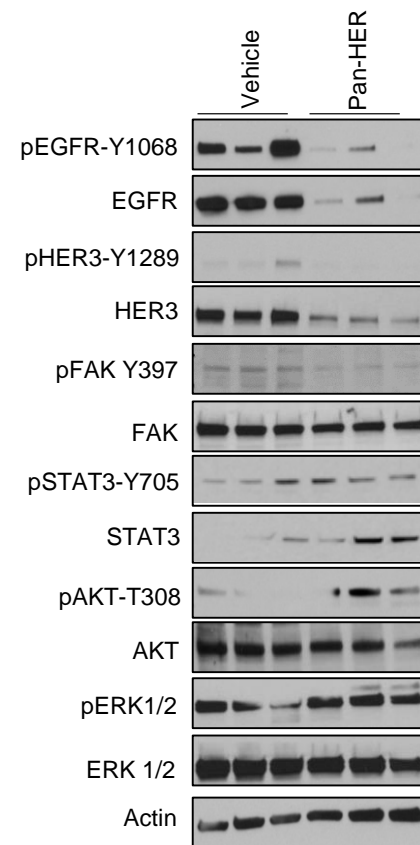



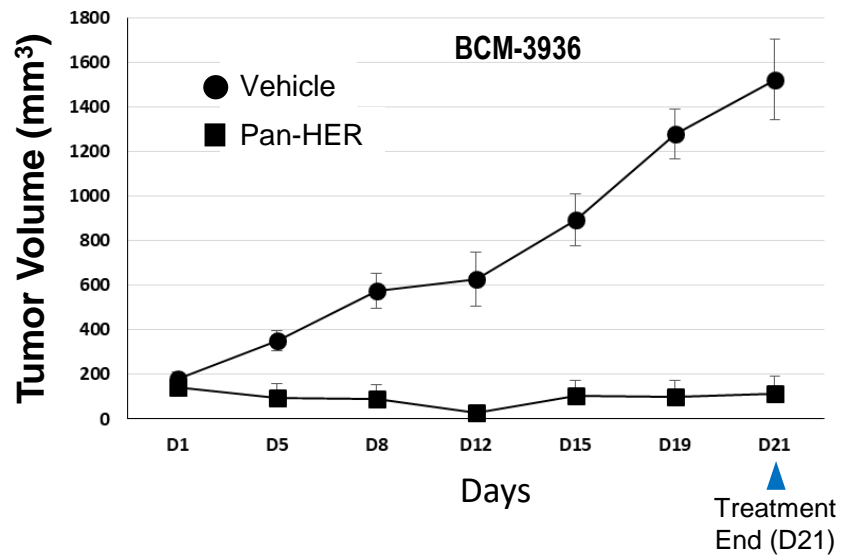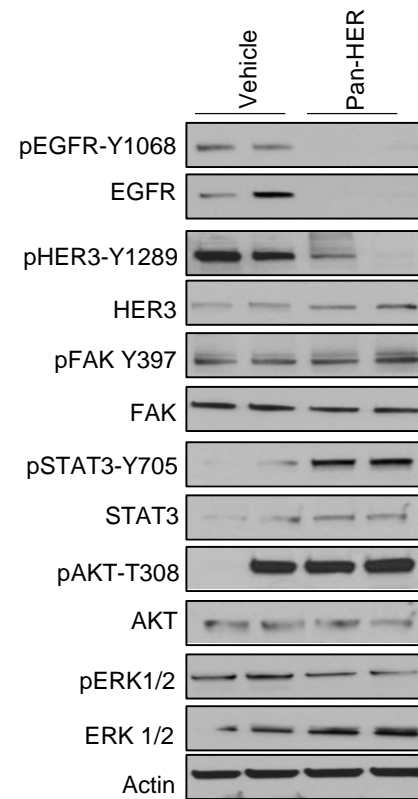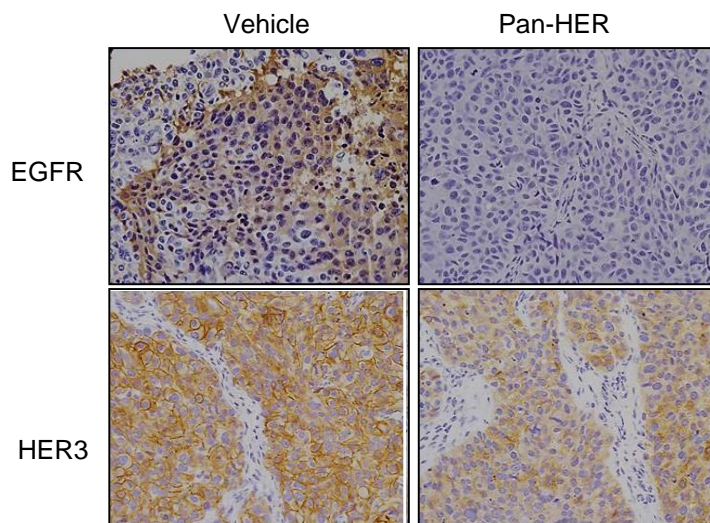



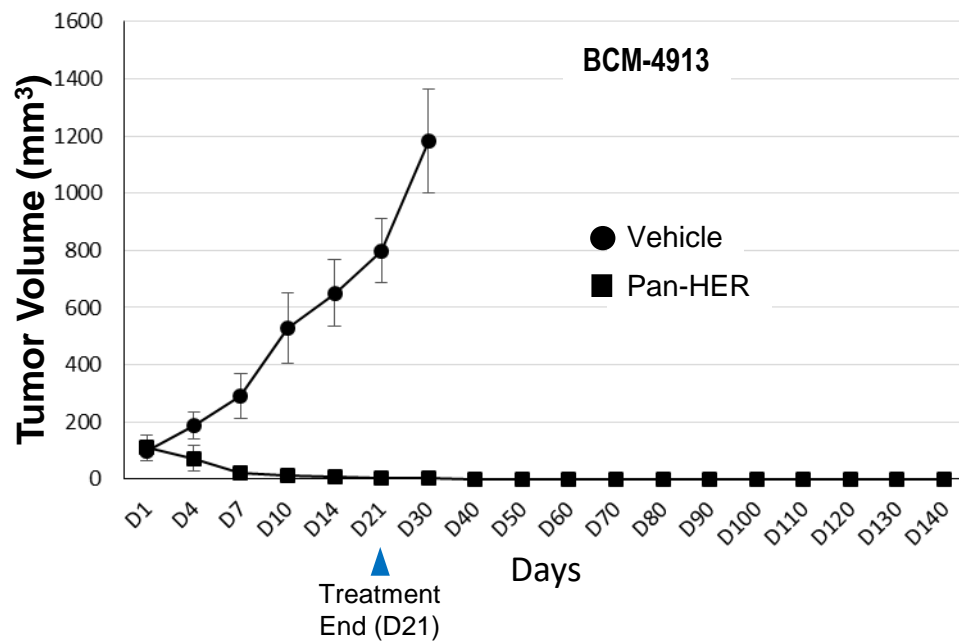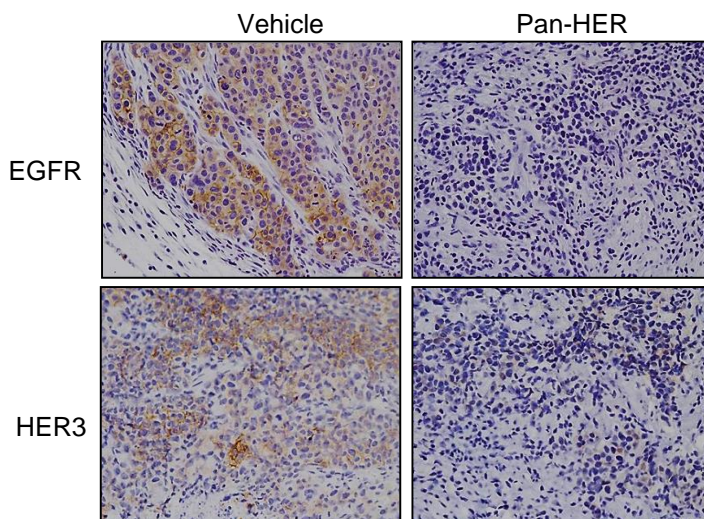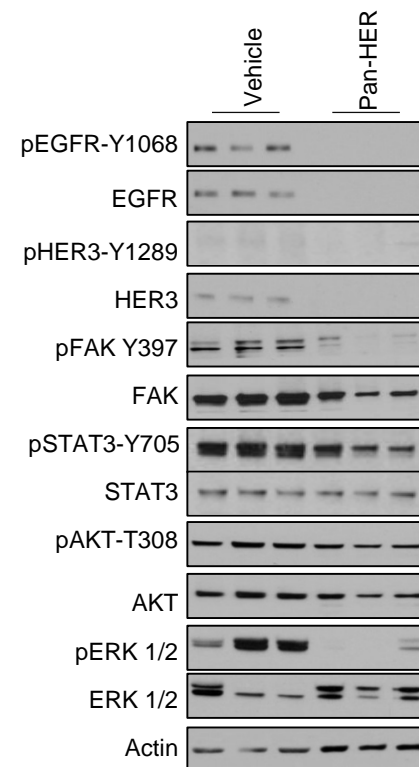

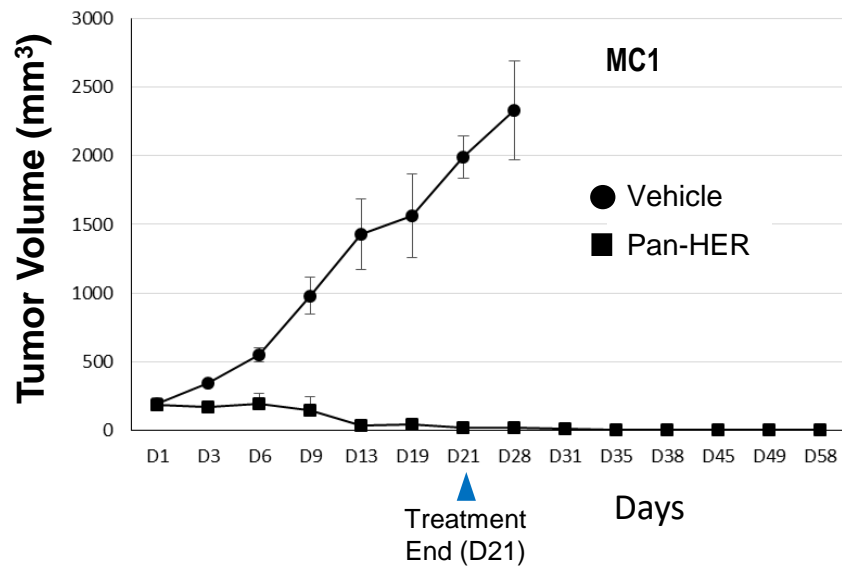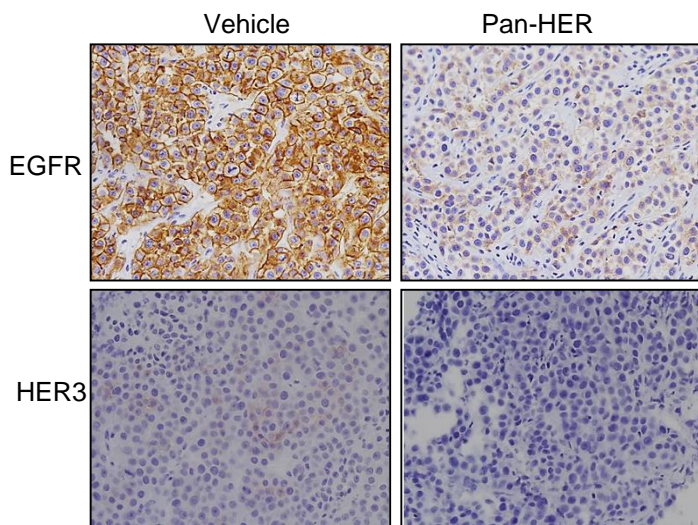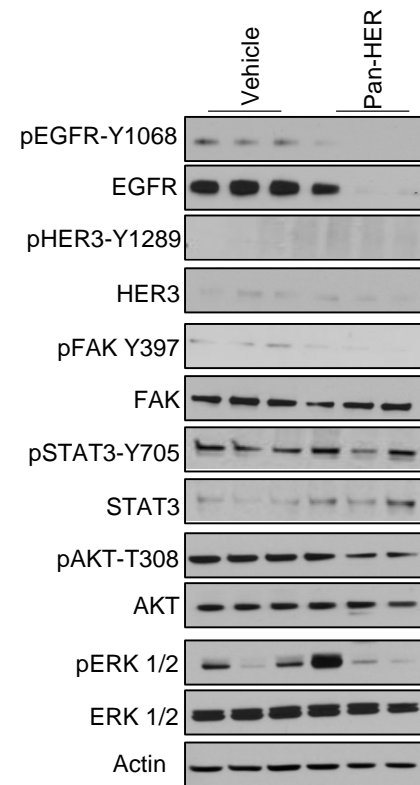

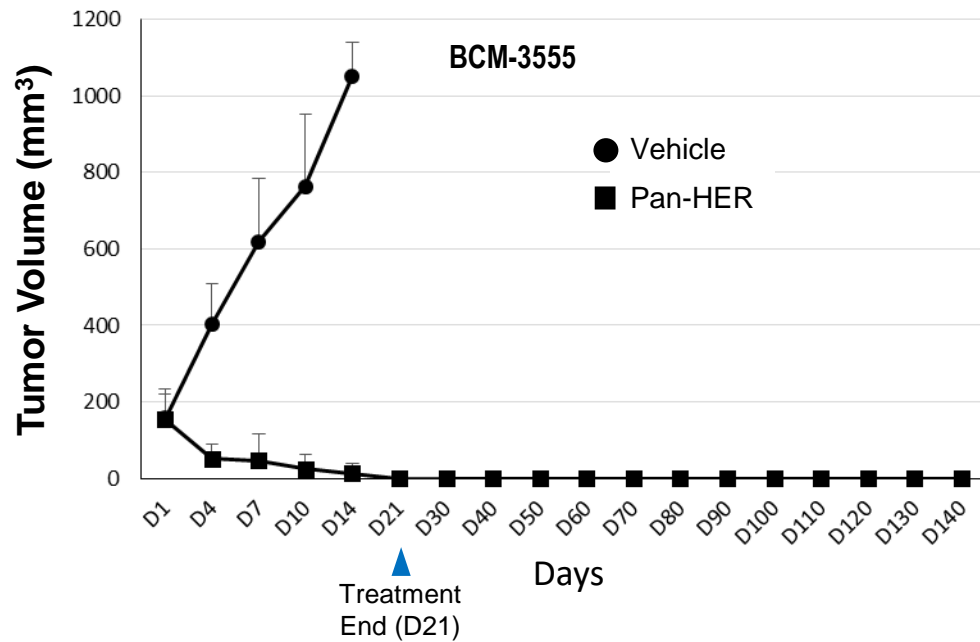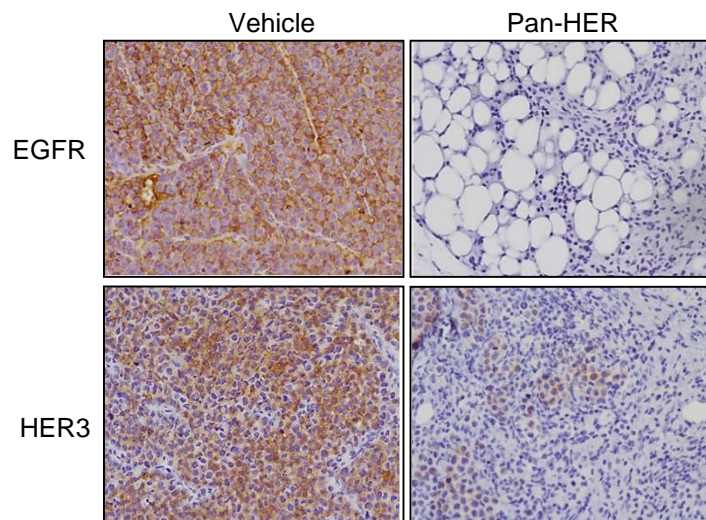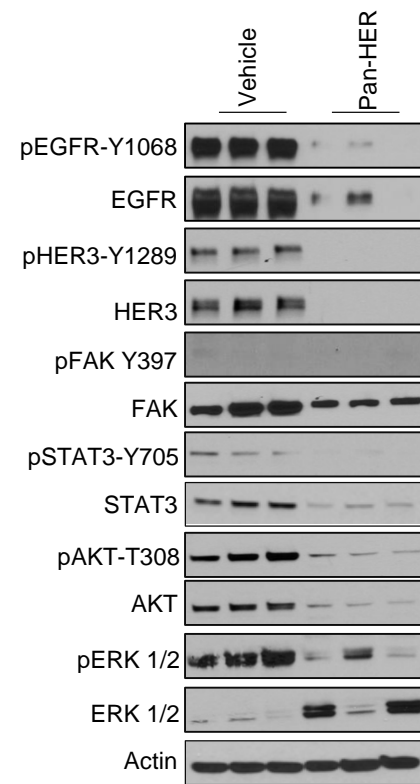

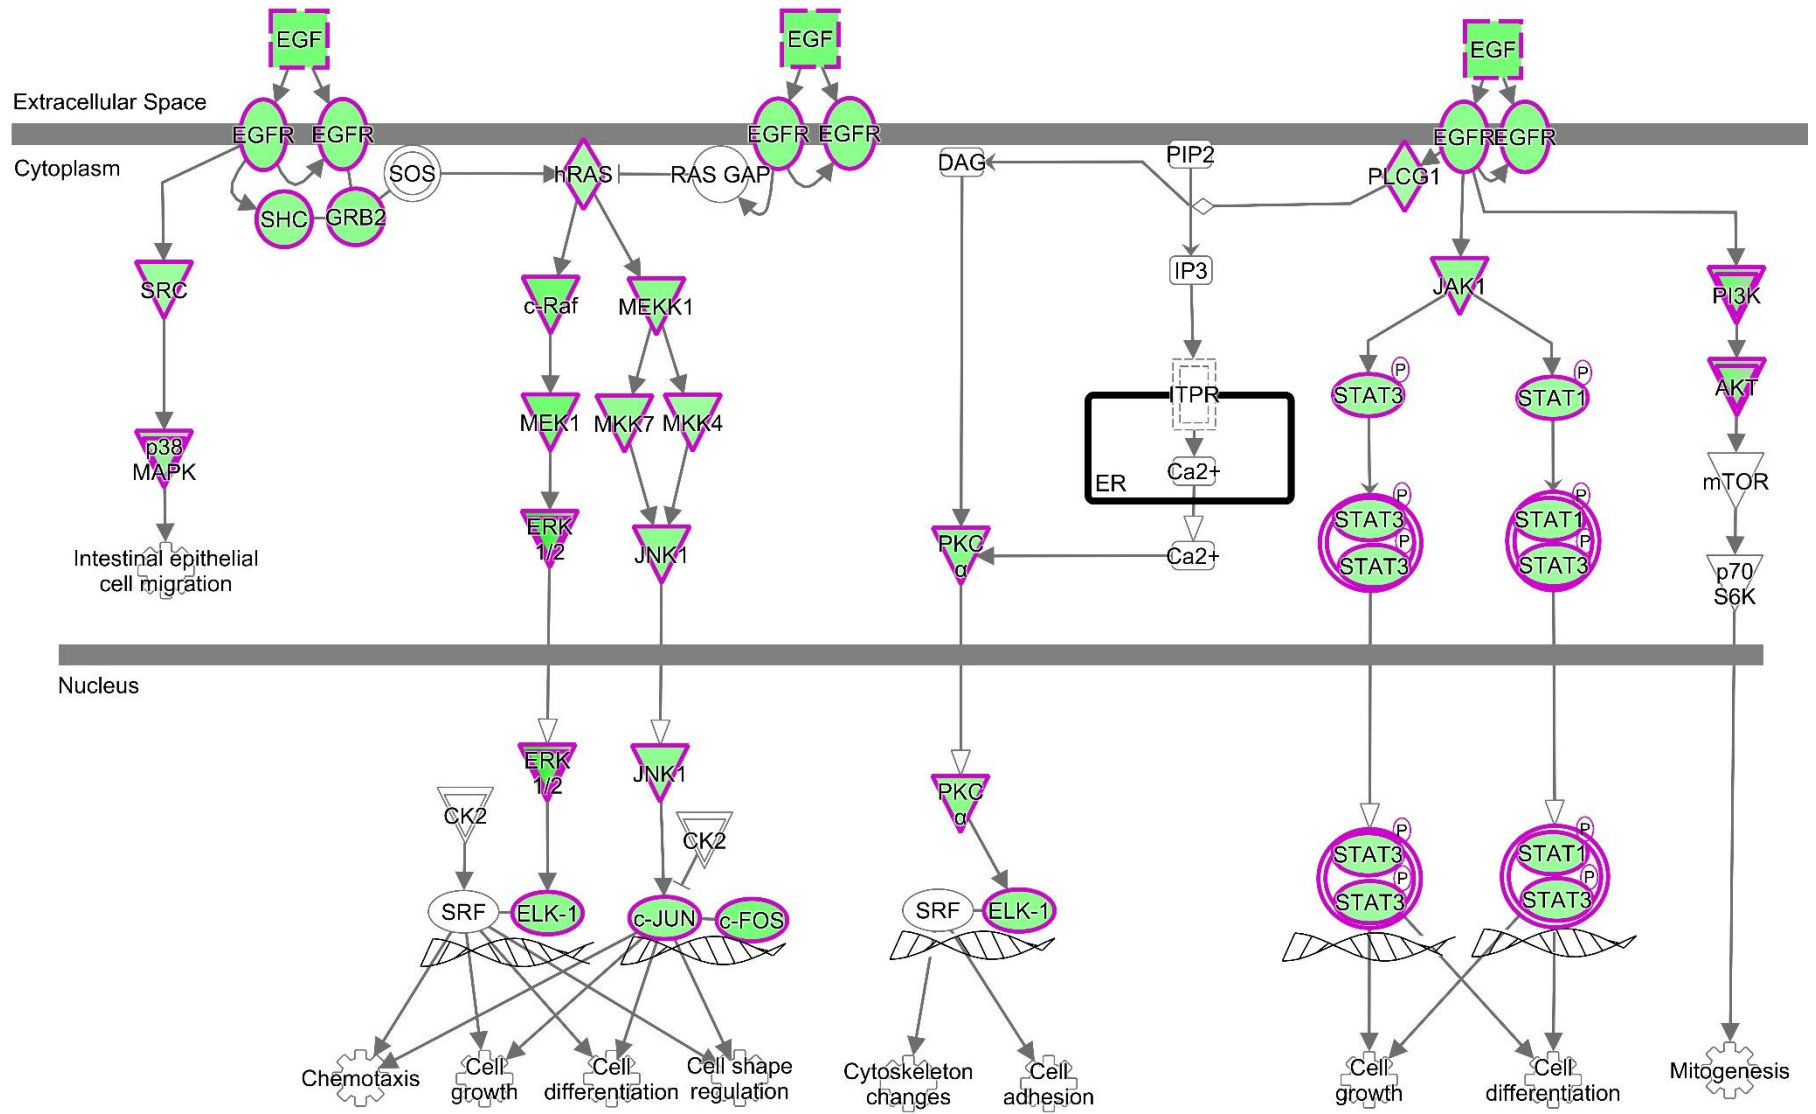

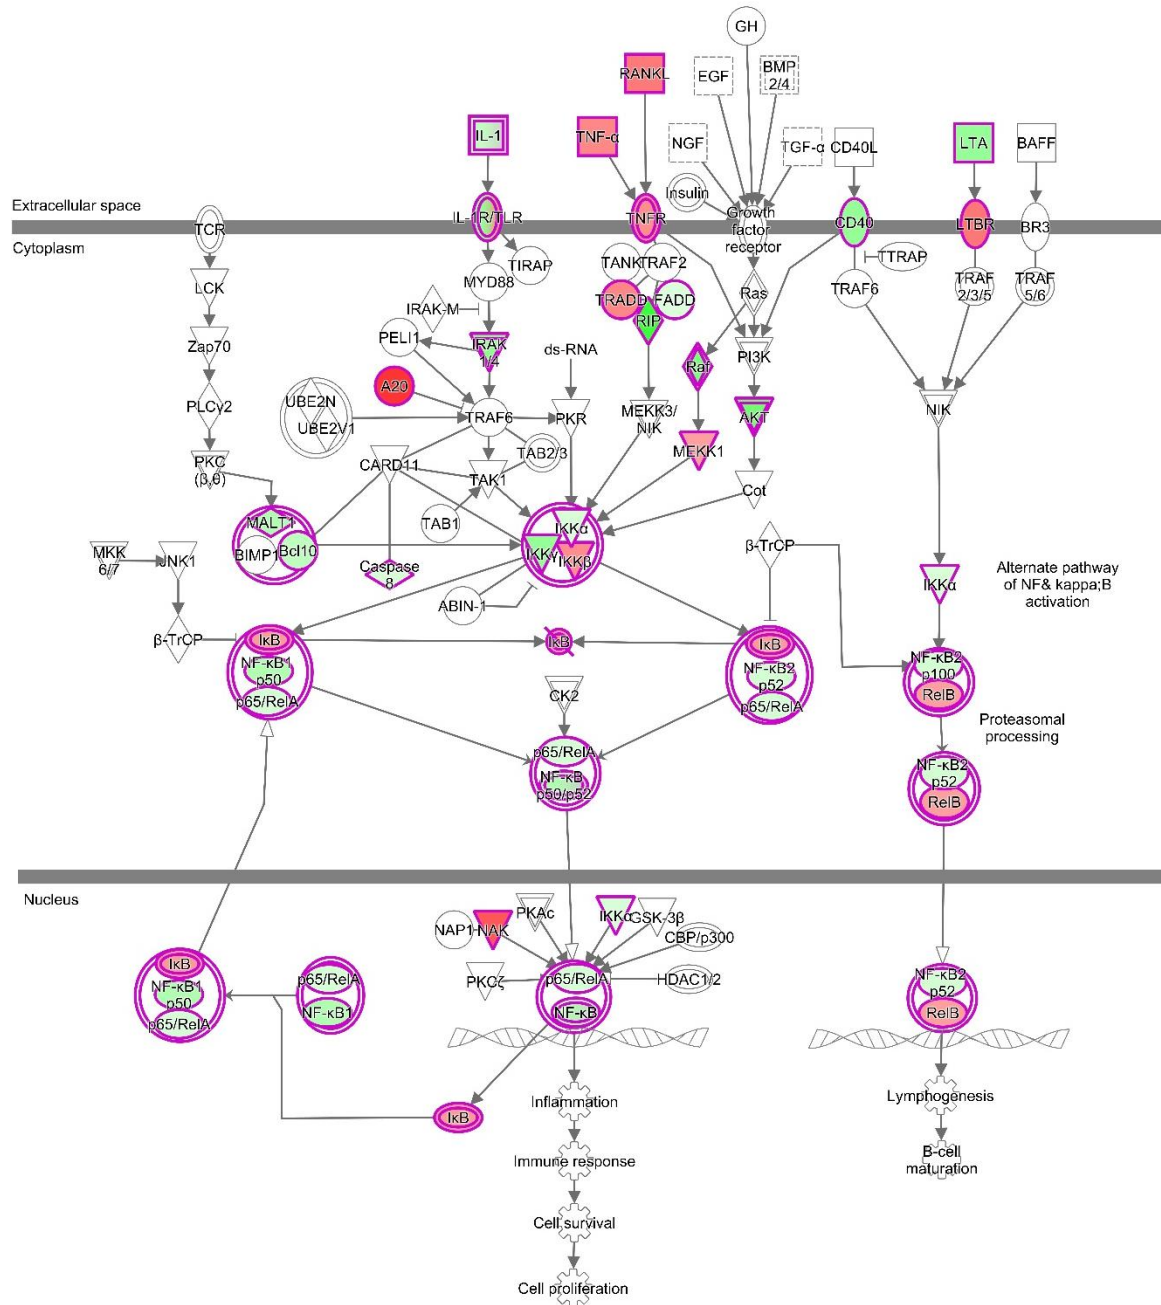



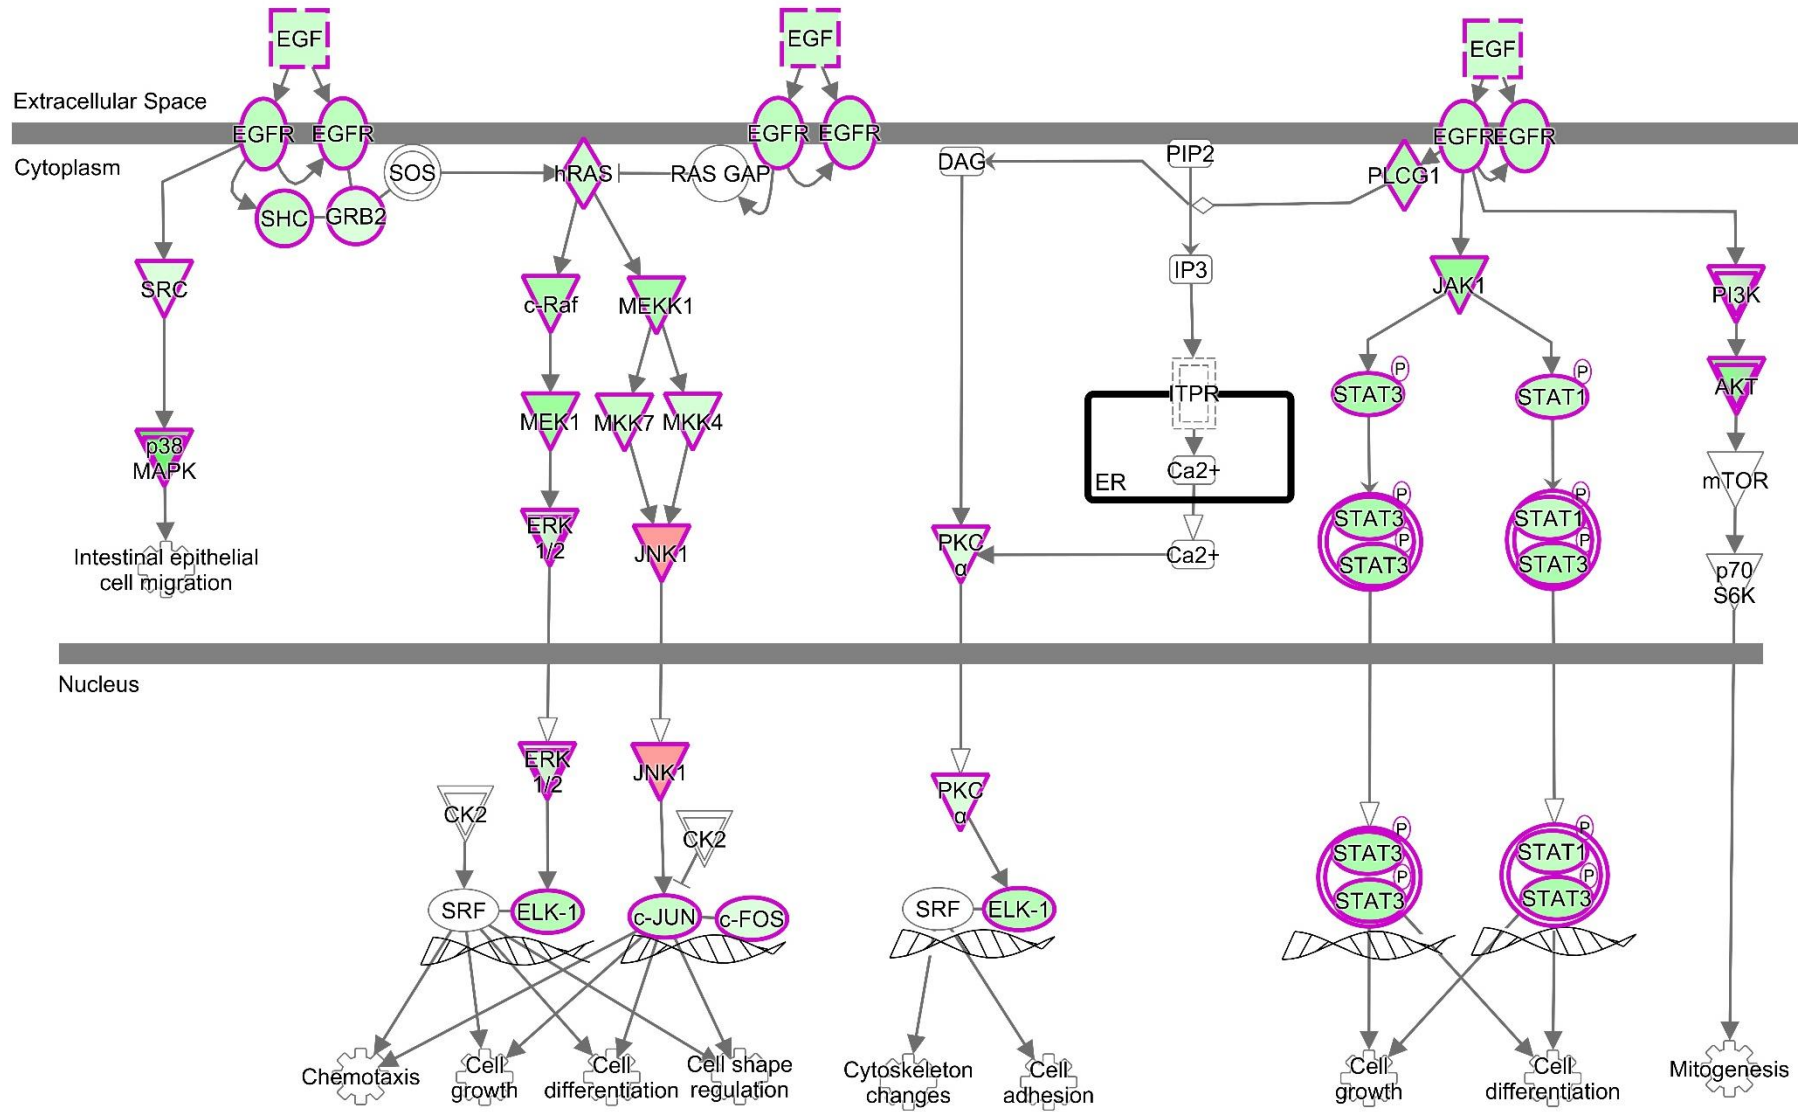

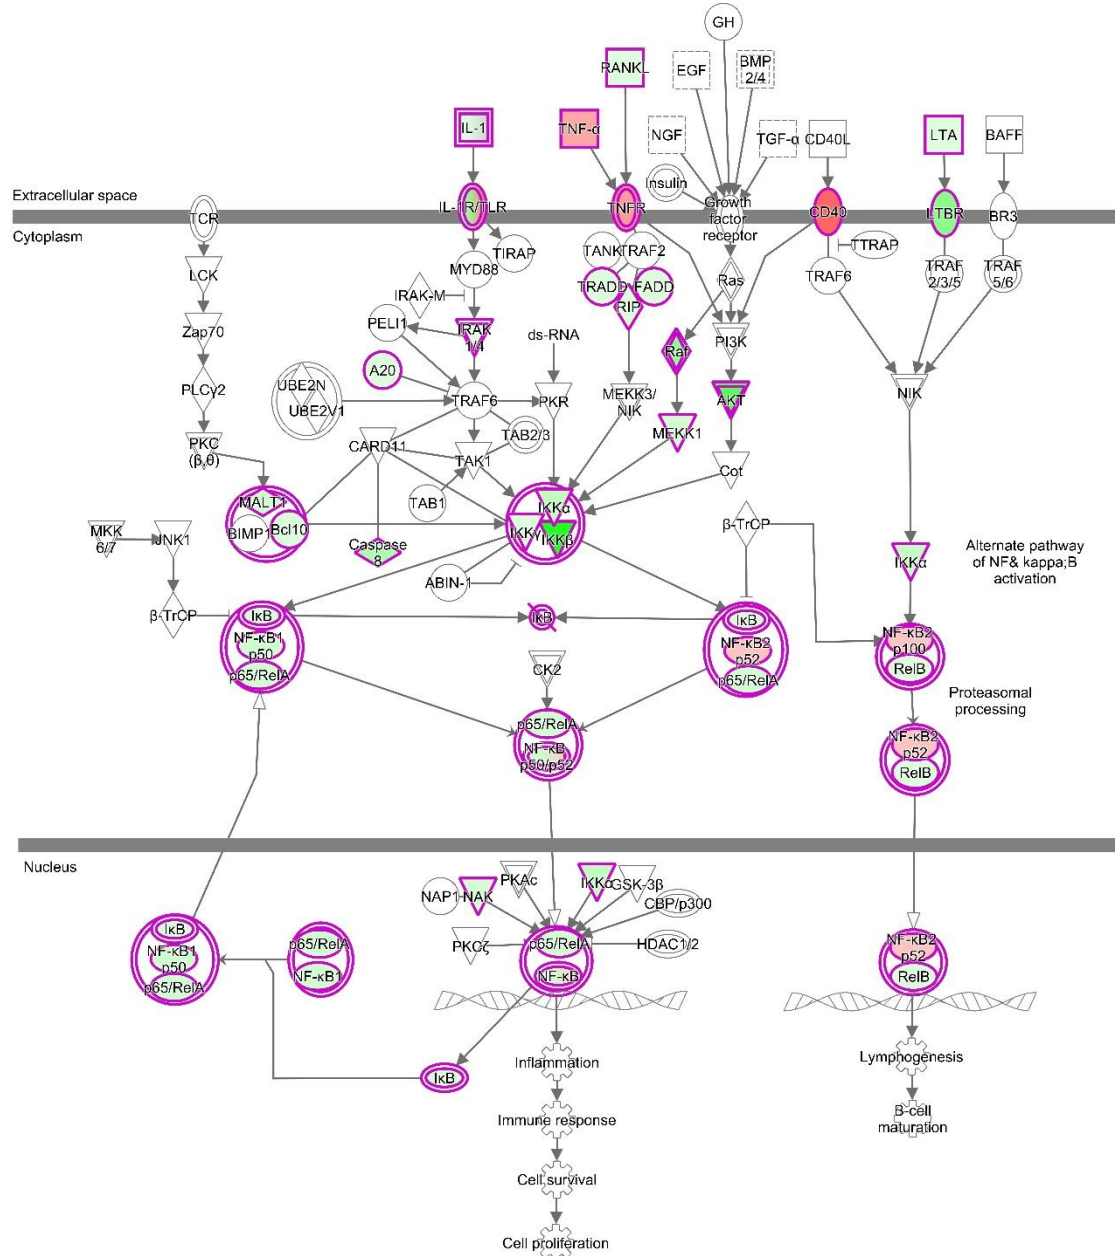

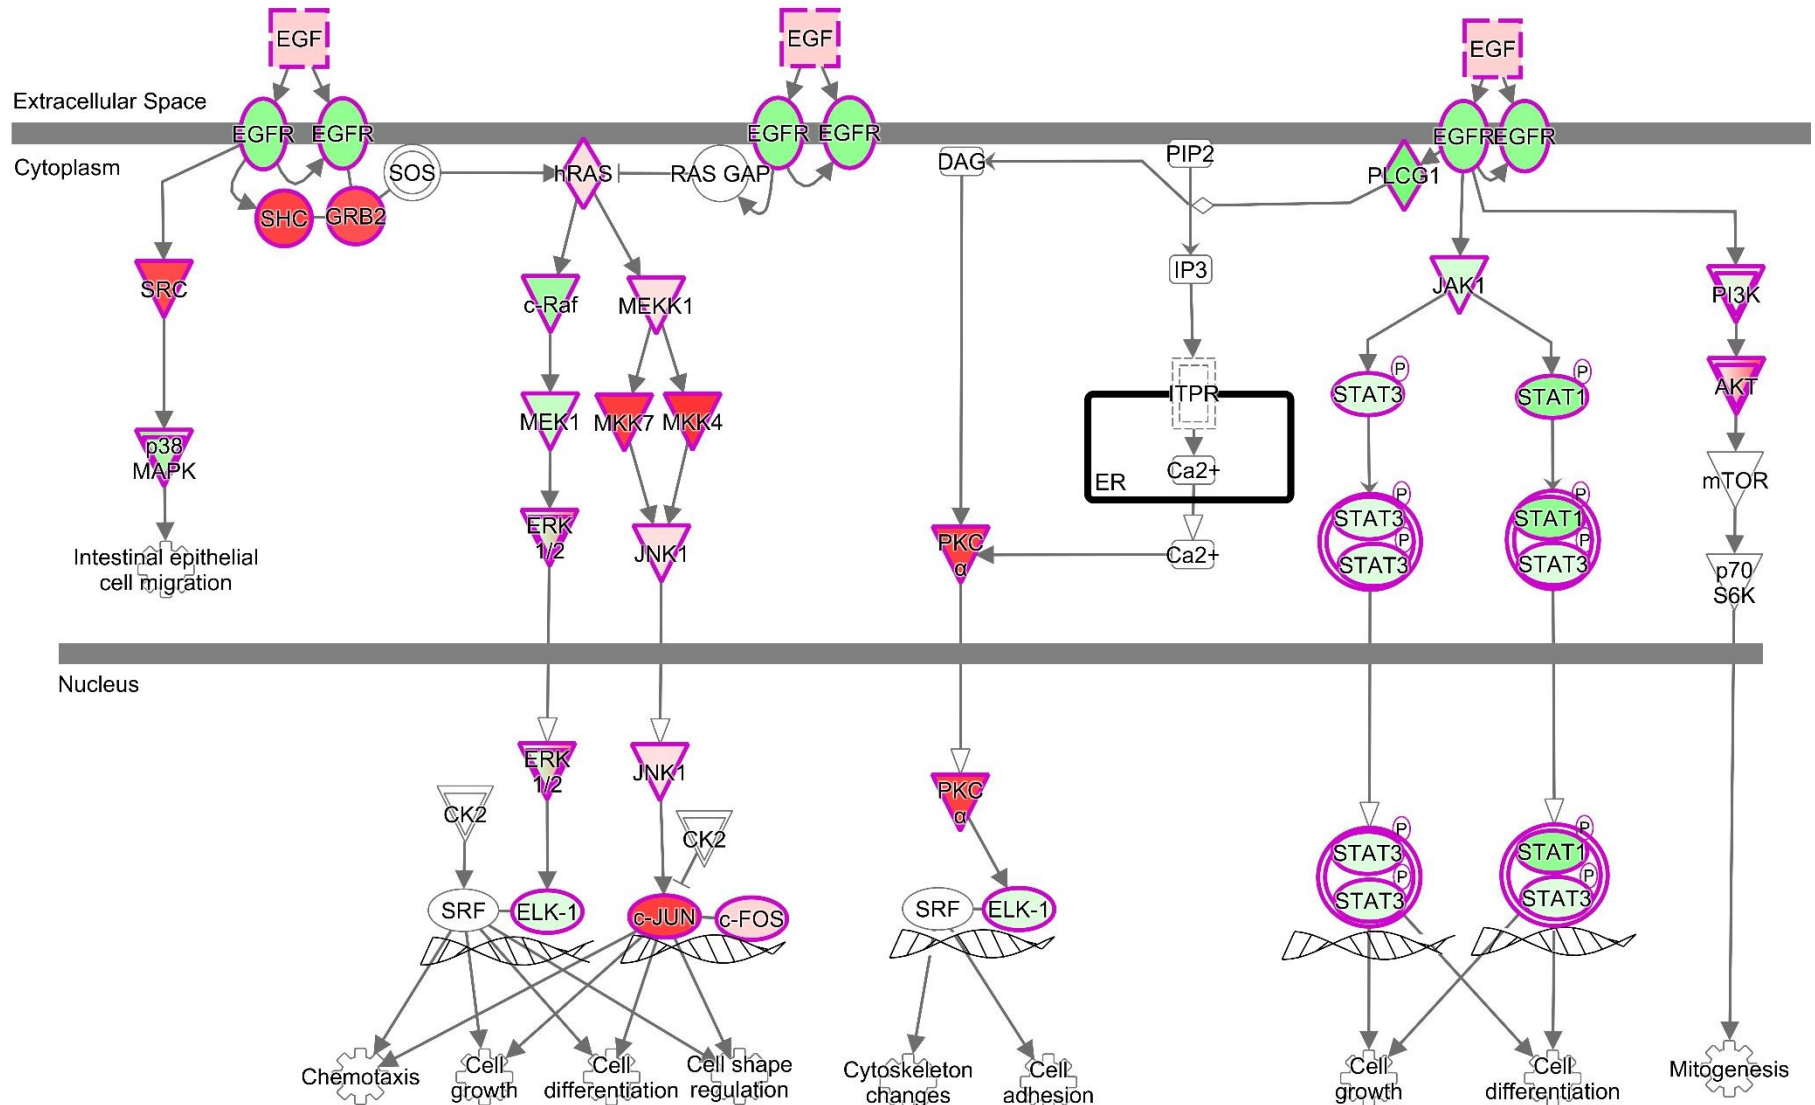

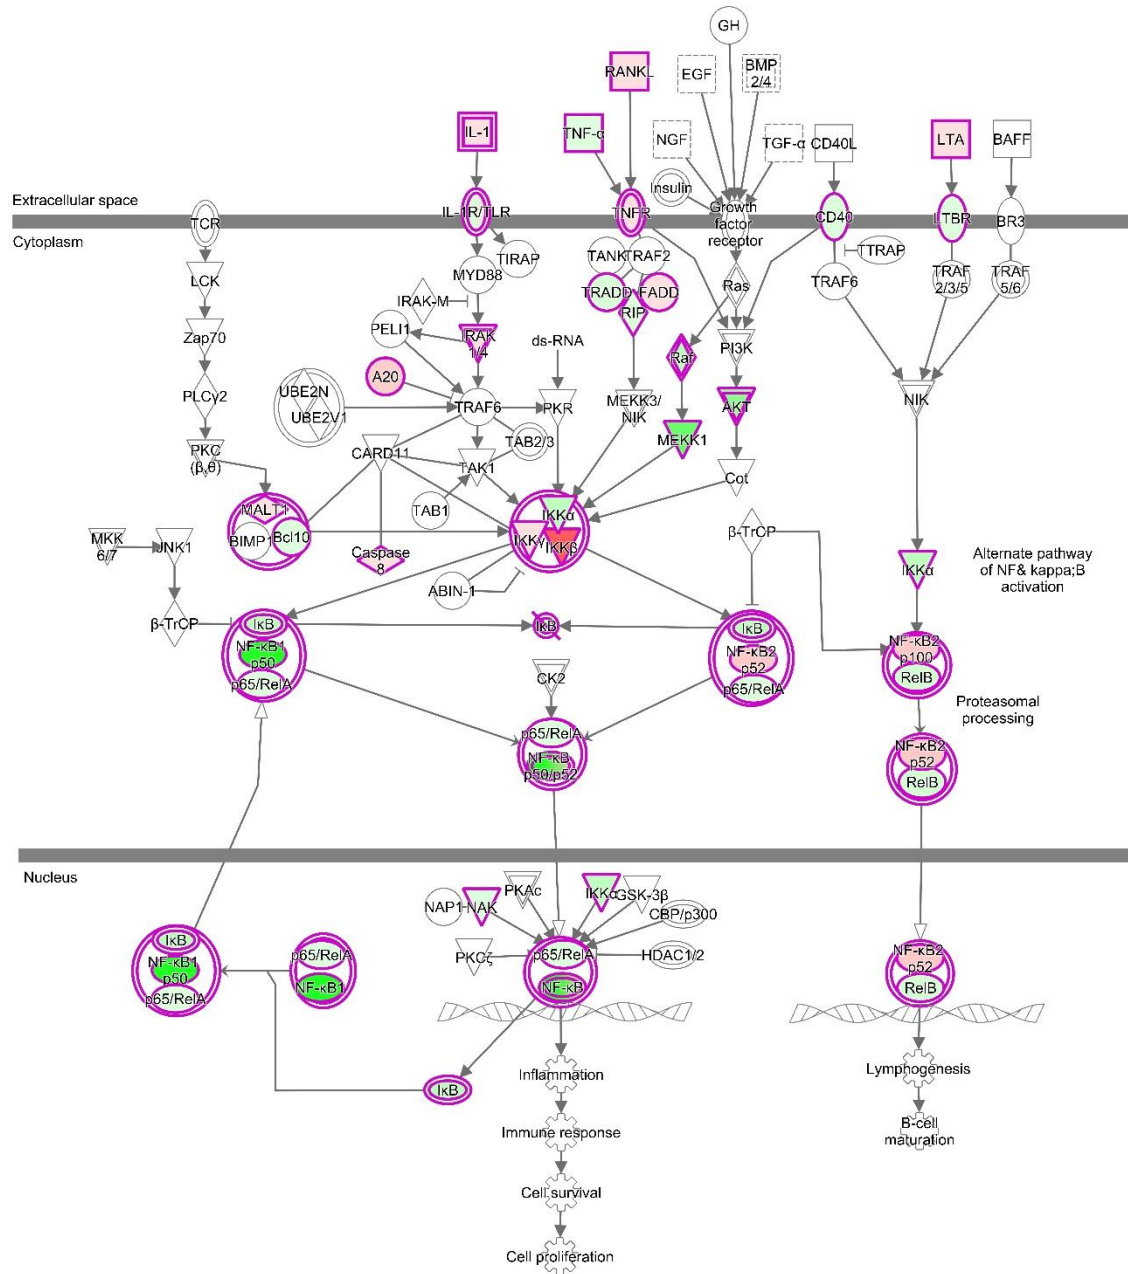

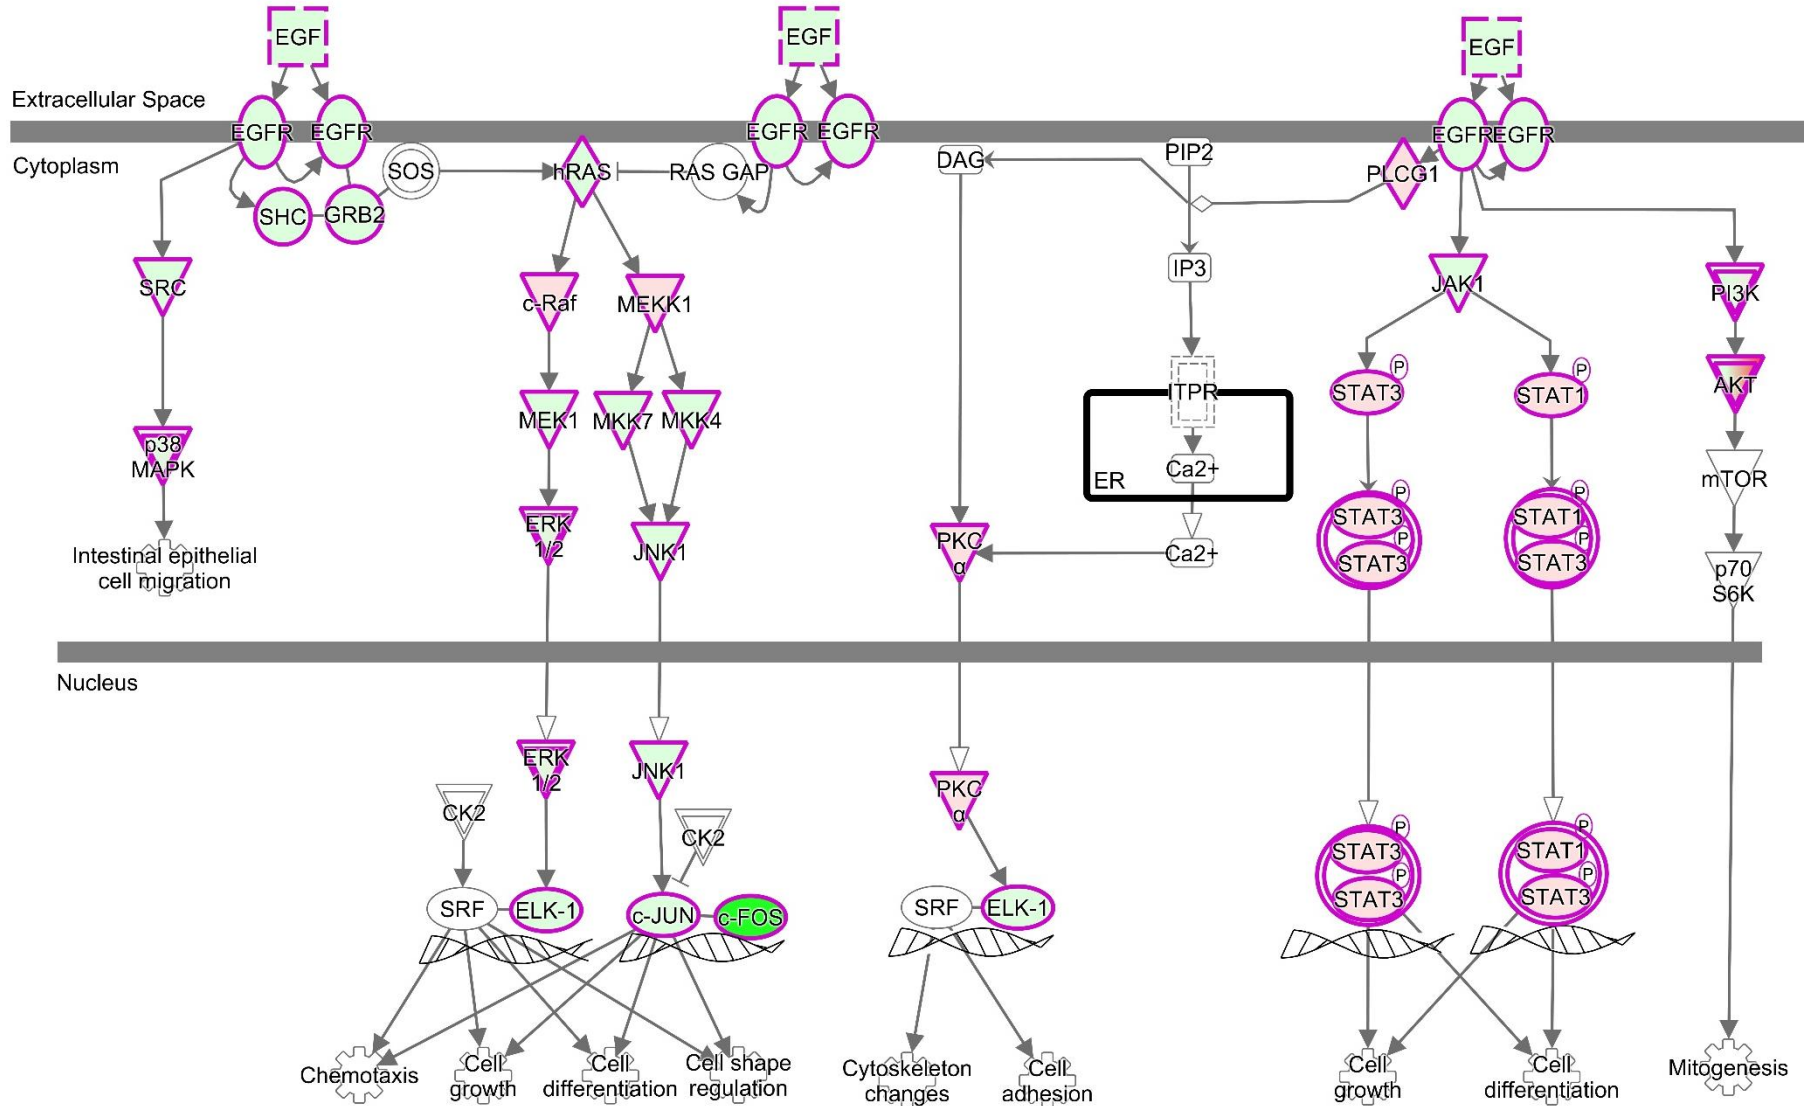



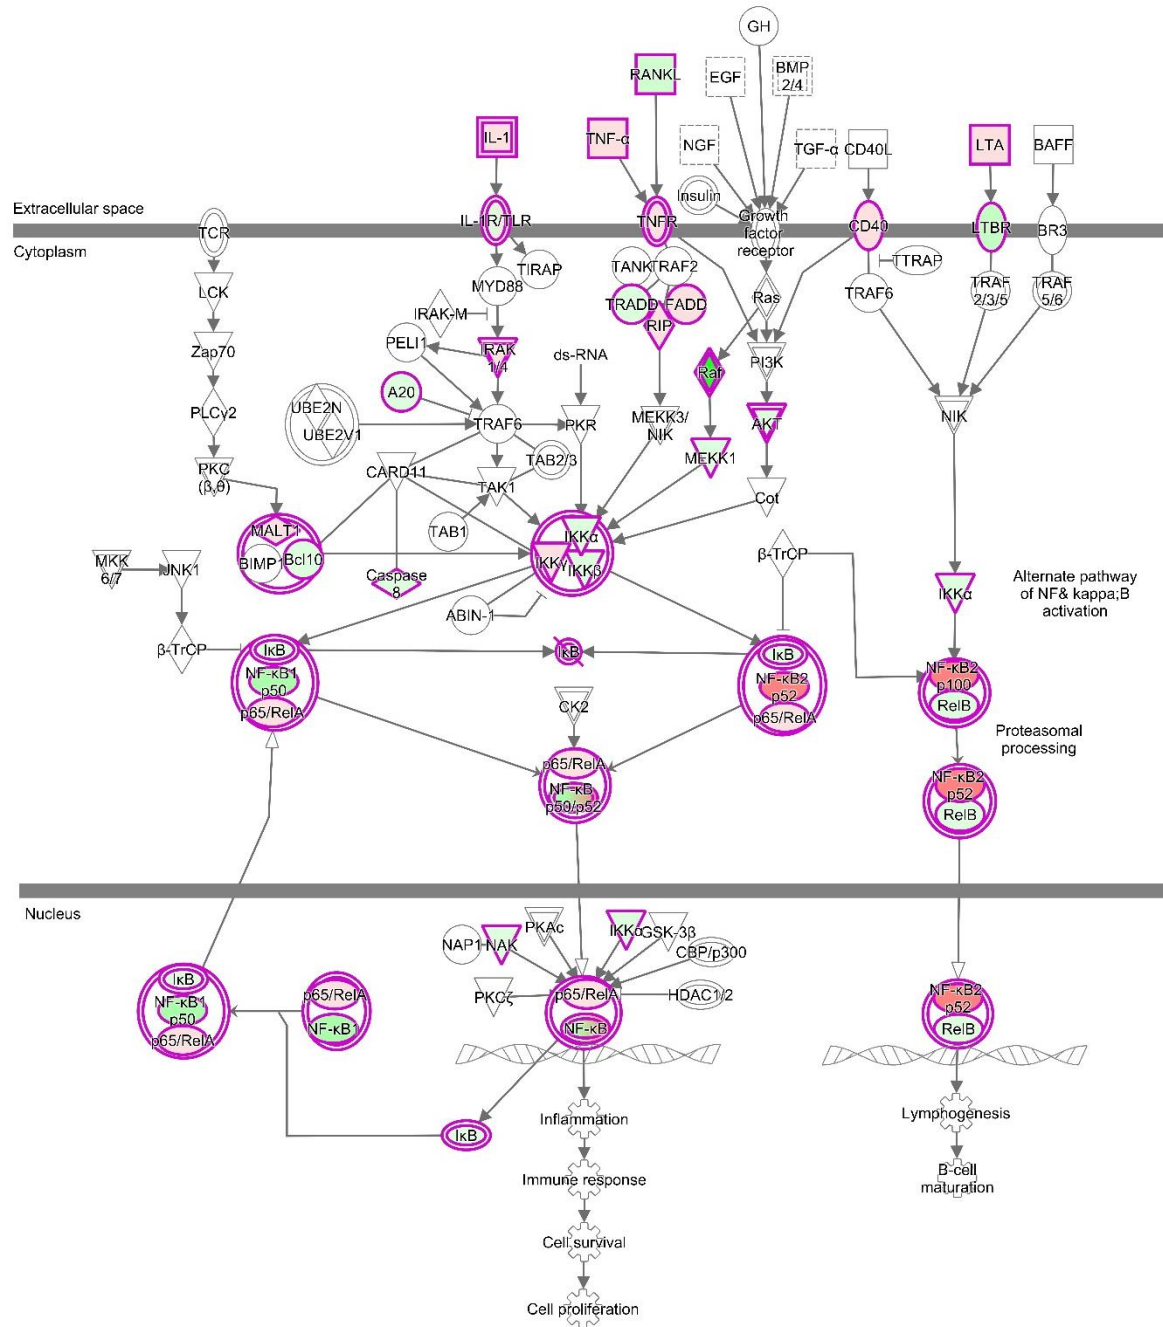

Supplement: 13058_2020_1280_MOESM2_ESM.pdf [file 13058_2020_1280_MOESM2_ESM.pdf]
