# Supplementary material for: Simultaneous targeting of HER family pro-survival signaling with Pan-HER antibody mixture is highly effective in TNBC: a preclinical trial with PDXs
Source: PubMed Central journal article supplement (PMC7227035; doi:10.1186/s13058-020-01280-z), 2020-05-15
Supplement: 13058_2020_1280_MOESM1_ESM.pdf [file 13058_2020_1280_MOESM1_ESM.pdf]

**Table S1.** Description of the main characteristics of each PDX tumor model used in the present study including their triple negative (i.e. ER-, PR-, and HER2-) status, and the positive expression of EGFR and HER3 in all of them, with the exception of BCM-4664, which was HER3-. Additional information includes, whenever available, TP53 mutations and PAM50 and Pientepol subtype classification.

|    | PDX lines | ER | PR | EGFR | HER2 | HER3 | BRCA Mutation | TP53 mutation | k-RAS Mutation | PI3KCA Mutation | cMet Mutation   | Drug Resistance (PDX) | Drug Resistance (Clinical) | Lung mets | Pam50 | Pientepol |
|----|-----------|----|----|------|------|------|---------------|---------------|----------------|-----------------|-----------------|-----------------------|----------------------------|-----------|-------|-----------|
| 1  | BCM-4664  | -  | -  | -/+  | -    | -    |               | c.747G>T      |                |                 |                 | Dasatinib             | Dasatinib<br>Docetaxel     | -         | Basal | IM        |
| 2  | HCI-002   | -  | -  | +    | -    | +    |               |               |                |                 |                 |                       |                            | -         | Basal | nd        |
| 3  | BCM-3887  | -  | -  | +    | -    | -    | +             | c.438G>A      |                |                 |                 |                       |                            | +         | Basal | M         |
| 4  | BCM-5471  | -  | -  | +    | -    | +    |               | -             |                |                 |                 |                       |                            | +         | Basal | nd        |
| 5  | BCM-2665  | -  | -  | +    | -    | +    |               | -             |                |                 |                 | Docetaxel             | Docetaxel                  | +         | Basal | BL1       |
| 6  | BCM-4013  | -  | -  | +    | -    | +    |               | c.733G>T      |                |                 |                 |                       |                            | +         | Basal | BL2       |
| 7  | BCM-4272  | -  | -  | +    | -    | +    |               | -             |                |                 |                 | Docetaxel             |                            | +         | Basal | UNC/BL1   |
| 8  | BCM-3204  | -  | -  | +    | -    | +    |               | -             |                |                 |                 |                       | Adriamycin                 | +         | Basal | M         |
| 9  | BCM-2147  | -  | -  | +    | -    | +    |               | -             |                |                 | N375S<br>A1124G |                       | Adriamycin                 | -         | Basal | BL1       |
| 10 | BCM-3107  | -  | -  | +    | -    | -/+  |               | c.722C>G      |                |                 |                 |                       |                            | -         | Basal | M         |
| 11 | HMCC-3186 | -  | -  | +    | -    | +    |               |               |                |                 |                 |                       |                            |           | nd    | nd        |
| 12 | BCM-3936  | -  | -  | +    | -    | +    |               | c.839G>C      |                |                 |                 |                       |                            | +         | Basal | M         |
| 13 | BCM-4913  | -  | -  | +    | -    | +    | +             | c.451C>T      |                |                 |                 | Docetaxel             | Docetaxel                  | -         | Basal | BL1/nd    |
| 14 | MC1       | -  | -  | +    | -    | -/+  |               |               |                |                 |                 |                       |                            |           | nd    | nd        |
| 15 | HMCC-3555 | -  | -  | +    | -    | +    |               |               |                |                 |                 |                       |                            |           | nd    | nd        |

**nd, not determined; Pientepol classification: BL1, basal-like 1; BL2 basal-like 2; IM, immunomodulatory; M, Mesenchymal-like; UNC, unclassified; +: EGFR mutation**





**Table S4.** Genes included in the pathway-focused RT-PCR analysis corresponding to the human EGFR and NF-kappa B signaling pathways (RealTimePrimers, Elkins Park, PA).

**HEGFR-1 Human EGFR Signaling Primer Library**

| Well Position | Gene Symbol | Description                                                                                            |
|---------------|-------------|--------------------------------------------------------------------------------------------------------|
| A1            | AKT1        | v-akt murine thymoma viral oncogene homolog 1                                                          |
| A2            | AKT2        | v-akt murine thymoma viral oncogene homolog 2                                                          |
| A3            | AKT3        | v-akt murine thymoma viral oncogene homolog 3 (protein kinase B, gamma)                                |
| A4            | ARAF        | v-raf murine sarcoma 3611 viral oncogene homolog                                                       |
| A5            | ATF2        | activating transcription factor 2                                                                      |
| A6            | BLC2        | B-cell CLL/lymphoma 2                                                                                  |
| A7            | BRAF        | v-raf murine sarcoma viral oncogene homolog B1                                                         |
| A8            | CAV1        | caveolin 1, caveolae protein, 22kDa                                                                    |
| A9            | CAV2        | caveolin 2                                                                                             |
| A10           | CASP3       | caspase 3, apoptosis-related cysteine peptidase                                                        |
| A11           | CASP9       | caspase 9, apoptosis-related cysteine peptidase                                                        |
| A12           | CBL         | Cbl proto-oncogene, E3 ubiquitin protein ligase                                                        |
| B1            | CHUK        | conserved helix-loop-helix ubiquitous kinase                                                           |
| B2            | CTNNB1      | Catenin Beta 1                                                                                         |
| B3            | DUSP1       | dual specificity phosphatase 1                                                                         |
| B4            | DUSP6       | dual specificity phosphatase 6                                                                         |
| B5            | EGF         | epidermal growth factor                                                                                |
| B6            | EGFR        | epidermal growth factor receptor                                                                       |
| B7            | ELK1        | ELK1, member of ETS oncogene family                                                                    |
| B8            | EPS8        | epidermal growth factor receptor pathway substrate 8                                                   |
| B9            | ERBB2       | v-erb-b2 erythroblastic leukemia viral oncogene homolog 2, neuro/glioblastoma derived oncogene homolog |
| B10           | FASLG       | Fas ligand (TNF superfamily, member 6)                                                                 |
| B11           | FOS         | FBJ murine osteosarcoma viral oncogene homolog                                                         |
| B12           | GAB1        | GRB2-associated binding protein 1                                                                      |
| C1            | GRB2        | growth factor receptor-bound protein 2                                                                 |
| C2            | HRAS        | v-Ha-ras Harvey rat sarcoma viral oncogene homolog                                                     |
| C3            | IKBKB       | inhibitor of kappa light polypeptide gene enhancer in B-cells, kinase beta                             |
| C4            | IKBKE       | inhibitor of kappa light polypeptide gene enhancer in B-cells, kinase epsilon                          |
| C5            | IKBKG       | inhibitor of kappa light polypeptide gene enhancer in B-cells, kinase gamma                            |
| C6            | JAK1        | Janus kinase 1                                                                                         |
| C7            | JAK2        | Janus kinase 2                                                                                         |
| C8            | JUN         | jun proto-oncogene                                                                                     |
| C9            | KRAS        | v-Ki-ras2 Kirsten rat sarcoma viral oncogene homolog                                                   |
| C10           | MAP2        | microtubule-associated protein 2                                                                       |

|     |        |                                                                                         |
|-----|--------|-----------------------------------------------------------------------------------------|
| C11 | MAP2K1 | mitogen-activated protein kinase kinase 1                                               |
| C12 | MAP2K2 | mitogen-activated protein kinase kinase 2                                               |
| D1  | MAP2K3 | mitogen-activated protein kinase kinase 3                                               |
| D2  | MAP2K4 | mitogen-activated protein kinase kinase 4                                               |
| D3  | MAP2K5 | mitogen-activated protein kinase kinase 5                                               |
| D4  | MAP2K6 | mitogen-activated protein kinase kinase 6                                               |
| D5  | MAP2K7 | mitogen-activated protein kinase kinase 7                                               |
| D6  | MAP3K1 | mitogen-activated protein kinase kinase kinase 1, E3 ubiquitin protein ligase           |
| D7  | MAP3K2 | mitogen-activated protein kinase kinase kinase 2                                        |
| D8  | MAP3K3 | mitogen-activated protein kinase kinase kinase 3                                        |
| D9  | MAPK1  | mitogen-activated protein kinase 1                                                      |
| D10 | MAPK10 | mitogen-activated protein kinase 10                                                     |
| D11 | MAPK12 | mitogen-activated protein kinase 12                                                     |
| D12 | MAPK14 | mitogen-activated protein kinase 14                                                     |
| E1  | MAPK3  | mitogen-activated protein kinase 3                                                      |
| E2  | MAPK8  | mitogen-activated protein kinase 8                                                      |
| E3  | MAPK9  | mitogen-activated protein kinase 9                                                      |
| E4  | MBP    | myelin basic protein                                                                    |
| E5  | MRAS   | muscle RAS oncogene homolog                                                             |
| E6  | MYC    | V-myc myelocytomatosis viral oncogene homolog (avian)                                   |
| E7  | NFKB1  | nuclear factor of kappa light polypeptide gene enhancer in B-cells 1                    |
| E8  | NRAS   | neuroblastoma RAS viral (v-ras) oncogene homolog                                        |
| E9  | PAK1   | p21 protein (Cdc42/Rac)-activated kinase 1                                              |
| E10 | PDGFB  | platelet-derived growth factor beta polypeptide                                         |
| E11 | PIKCA  | phosphoinositide-3-kinase, catalytic, alpha polypeptide                                 |
| E12 | PIK3R1 | phosphoinositide-3-kinase, regulatory subunit 1 (alpha)                                 |
| F1  | PIK3R2 | phosphoinositide-3-kinase, regulatory subunit 2 (beta)                                  |
| F2  | PIK3R3 | phospholipase C, beta 3 (phosphatidylinositol- specific)                                |
| F3  | PLCG1  | phospholipase C, gamma 1                                                                |
| F4  | PRKCA  | protein kinase C, alpha                                                                 |
| F5  | PRKCB  | protein kinase C, beta                                                                  |
| F6  | PRKCD  | protein kinase C, delta                                                                 |
| F7  | PRKCE  | protein kinase C, epsilon                                                               |
| F8  | PRKCG  | protein kinase C, gamma                                                                 |
| F9  | PTEN   | phosphatase and tensin homolog                                                          |
| F10 | RAC1   | ras-related C3 botulinum toxin substrate 1 (rho family, small GTP binding protein Rac1) |
| F11 | RAC2   | ras-related C3 botulinum toxin substrate 2 (rho family, small GTP binding protein Rac2) |
| F12 | RAC3   | ras-related C3 botulinum toxin substrate 3 (rho family, small GTP binding protein Rac3) |
| G1  | RAF1   | v-raf-1 murine leukemia viral oncogene homolog 1                                        |
| G2  | RAP1A  | RAP1A, member of RAS oncogene family                                                    |

|     |        |                                                                                                                                       |
|-----|--------|---------------------------------------------------------------------------------------------------------------------------------------|
| G3  | REL    | v-rel reticuloendotheliosis viral oncogene homolog (avian)                                                                            |
| G4  | RELA   | v-rel reticuloendotheliosis viral oncogene homolog A (avian)                                                                          |
| G5  | RELB   | v-rel reticuloendotheliosis viral oncogene homolog B                                                                                  |
| G6  | RHOA   | ras homolog family member A                                                                                                           |
| G7  | RHOB   | ras homolog family member B                                                                                                           |
| G8  | RHOC   | ras homolog family member C                                                                                                           |
| G9  | RHOD   | ras homolog family member D                                                                                                           |
| G10 | RHOG   | ras homolog family member G                                                                                                           |
| G11 | RRAS   | related RAS viral (r-ras) oncogene homolog                                                                                            |
| G12 | SHC1   | SHC (Src homology 2 domain containing) transforming protein 1                                                                         |
| H1  | SIPA1  | signal-induced proliferation-associated 1                                                                                             |
| H2  | SRC    | v-src sarcoma (Schmidt-Ruppin A-2) viral oncogene homolog (avian)                                                                     |
| H3  | STAT1  | signal transducer and activator of transcription 1, 91kDa<br>signal transducer and activator of transcription 3 (acute-phase response |
| H4  | STAT3  | factor)                                                                                                                               |
| H5  | ACTB   | Actin, beta                                                                                                                           |
| H6  | B2M    | Beta-2-microglobulin                                                                                                                  |
| H7  | GAPDH  | Glyceraldehyde-3-phosphate dehydrogenase                                                                                              |
| H8  | GUSB   | Glucuronidase, beta                                                                                                                   |
| H9  | HPRT1  | Hypoxanthine phosphoribosyltransferase 1                                                                                              |
| H10 | PGK1   | Phosphoglycerate kinase 1                                                                                                             |
| H11 | PPIA   | Peptidylprolyl isomerase A                                                                                                            |
| H12 | RPL13A | Ribosomal protein L13a                                                                                                                |

## Human NFKB Signaling Primer Library

| Well Position | Gene Symbol | Description                                                                   |
|---------------|-------------|-------------------------------------------------------------------------------|
| A1            | AGT         | Angiotensinogen                                                               |
| A2            | AKT1        | V-akt murine thymoma viral oncogene homolog 1                                 |
| A3            | ATF1        | Activating transcription factor 1                                             |
| A4            | BCL10       | B-cell CLL/lymphoma 10                                                        |
| A5            | BCL2        | B-cell CLL/lymphoma 2                                                         |
| A6            | BCL2L1      | BCL2-like 1                                                                   |
| A7            | BCL3        | B-cell CLL/lymphoma 3                                                         |
| A8            | BIRC2       | Baculoviral IAP repeat-containing 2                                           |
| A9            | BIRC4       | Baculoviral IAP repeat-containing 4                                           |
| A10           | CASP1       | Caspase 1, apoptosis-related cysteine peptidase                               |
| A11           | CASP8       | Caspase 8, apoptosis-related cysteine peptidase                               |
| A12           | CCL2        | Chemokine (C-C motif) ligand 2                                                |
| B1            | CD40        | CD40 molecule, TNF receptor superfamily member 5                              |
| B2            | CFLAR       | CASP8 and FADD-like apoptosis regulator                                       |
| B3            | CHUK        | Conserved helix-loop-helix ubiquitous kinase                                  |
| B4            | CSF1        | Colony stimulating factor 1 (macrophage)                                      |
| B5            | CSF2        | Colony stimulating factor 2 (granulocyte- macrophage)                         |
| B6            | CSF3        | Colony stimulating factor 3 (granulocyte)                                     |
| B7            | EDARADD     | EDAR-associated death domain                                                  |
| B8            | EDG2        | Lysophosphatidic acid receptor 1                                              |
| B9            | EGR1        | Early growth response 1                                                       |
| B10           | ELK1        | ELK1, member of ETS oncogene family                                           |
| B11           | F2R         | Coagulation factor II (thrombin) receptor                                     |
| B12           | FADD        | Fas (TNFRSF6)-associated via death domain                                     |
| C1            | FASLG       | Fas ligand (TNF superfamily, member 6)                                        |
| C2            | FOS         | V-fos FBJ murine osteosarcoma viral oncogene                                  |
| C3            | GJA1        | Gap junction protein, alpha 1, 43kDa                                          |
| C4            | HMOX1       | Heme oxygenase (decycling) 1                                                  |
| C5            | HTR2B       | 5-hydroxytryptamine (serotonin) receptor 2B                                   |
| C6            | ICAM1       | Intercellular adhesion molecule 1 (CD54)                                      |
| C7            | IFNA1       | Interferon, alpha 1                                                           |
| C8            | IFNAB1      | Interferon, beta 1                                                            |
| C9            | IFNG        | Interferon, gamma                                                             |
| C10           | IKBKB       | Inhibitor of kappa light polypeptide gene enhancer in B-cells, kinase beta    |
| C11           | IKBKE       | Inhibitor of kappa light polypeptide gene enhancer in B-cells, kinase epsilon |
| C12           | IKBKG       | Inhibitor of kappa light polypeptide gene enhancer in B-cells, kinase gamma   |
| D1            | IL10        | Interleukin 10                                                                |

|     |        |                                                                                                                                                     |
|-----|--------|-----------------------------------------------------------------------------------------------------------------------------------------------------|
| D2  | IL12A  | Interleukin 12A                                                                                                                                     |
| D3  | IL12B  | Interleukin 12B                                                                                                                                     |
| D4  | IL1A   | Interleukin 1, alpha                                                                                                                                |
| D5  | IL1B   | Interleukin 1, beta                                                                                                                                 |
| D6  | IL1R1  | Interleukin 1 receptor, type I                                                                                                                      |
| D7  | IL6    | Interleukin 6 (interferon, beta 2)                                                                                                                  |
| D8  | IL8    | Interleukin 8                                                                                                                                       |
| D9  | IRAK1  | Interleukin-1 receptor-associated kinase 1                                                                                                          |
| D10 | IRAK2  | Interleukin-1 receptor-associated kinase 2                                                                                                          |
| D11 | JUN    | Jun oncogene                                                                                                                                        |
| D12 | LTA    | Lymphotoxin alpha (TNF superfamily, member 1)                                                                                                       |
| E1  | LTB    | Lymphotoxin beta (TNF superfamily, member 3)                                                                                                        |
| E2  | LTBR   | Lymphotoxin beta receptor                                                                                                                           |
| E3  | MALT1  | Mucosa associated lymphoid tissue lymphoma translocation gene 1                                                                                     |
| E4  | MAP3K1 | Mitogen-activated protein kinase kinase kinase 1                                                                                                    |
| E5  | MMP7   | Matrix metalloproteinase 7 (matrilysin, uterine)                                                                                                    |
| E6  | MMP9   | Matrix metalloproteinase 9                                                                                                                          |
| E7  | NFKB1  | Nuclear factor of kappa light polypeptide gene enhancer in B-cells 1 (p105)<br>Nuclear factor of kappa light polypeptide gene enhancer in B-cells 2 |
| E8  | NFKB2  | (p49/p100)<br>Nuclear factor of kappa light polypeptide gene enhancer in B-cells                                                                    |
| E9  | NFKBIA | inhibitor, alpha                                                                                                                                    |
| E10 | NLRP12 | NLR family, pyrin domain containing 12                                                                                                              |
| E11 | NOD1   | Nucleotide-binding oligomerization domain containing 1                                                                                              |
| E12 | PPM1A  | Protein phosphatase 1A (formerly 2C), alpha isoform                                                                                                 |
| F1  | RAF1   | V-raf-1 murine leukemia viral oncogene homolog 1                                                                                                    |
| F2  | REL    | V-rel reticuloendotheliosis viral oncogene homolog (avian)                                                                                          |
| F3  | RELA   | V-rel reticuloendotheliosis viral oncogene homolog A                                                                                                |
| F4  | RELB   | V-rel reticuloendotheliosis viral oncogene homolog B                                                                                                |
| F5  | RHOA   | Ras homolog gene family, member A                                                                                                                   |
| F6  | RIPK1  | Receptor (TNFRSF)-interacting serine-threonine kinase 1                                                                                             |
| F7  | SELL   | Selectin L                                                                                                                                          |
| F8  | SELP   | Selectin P                                                                                                                                          |
| F9  | STAT1  | Signal transducer and activator of transcription 1                                                                                                  |
| F10 | TBK1   | TANK binding kinase 1                                                                                                                               |
| F11 | TICAM1 | Toll-like receptor adaptor molecule 1                                                                                                               |
| F12 | TICAM2 | Transmembrane emp24 protein transport domain containing 7                                                                                           |
| G1  | TLR1   | Toll-like receptor 1                                                                                                                                |
| G2  | TLR2   | Toll-like receptor 2                                                                                                                                |
| G3  | TLR3   | Toll-like receptor 3                                                                                                                                |
| G4  | TLR4   | Toll-like receptor 4                                                                                                                                |
| G5  | TLR7   | Toll-like receptor 7                                                                                                                                |
| G6  | TLR8   | Toll-like receptor 8                                                                                                                                |

|     |           |                                                           |
|-----|-----------|-----------------------------------------------------------|
| G7  | TLR9      | Toll-like receptor 9                                      |
| G8  | TMED4     | Transmembrane emp24 protein transport domain containing 4 |
| G9  | TNF       | Tumor necrosis factor (TNF superfamily, member 2)         |
| G10 | TNFAIP3   | Tumor necrosis factor, alpha-induced protein 3            |
| G11 | TNFRSF10A | Tumor necrosis factor receptor superfamily, member 10a    |
| G12 | TNFRSF10B | Tumor necrosis factor receptor superfamily, member 10b    |
| H1  | TNFRSF1A  | Tumor necrosis factor receptor superfamily, member 1A     |
| H2  | TNFSF10   | Tumor necrosis factor (ligand) superfamily, member 10     |
| H3  | TNFSF15   | Tumor necrosis factor (ligand) superfamily, member 15     |
| H4  | TRADD     | TNFRSF1A-associated via death domain                      |
| H5  | ACTB      | Actin, beta                                               |
| H6  | B2M       | Beta-2-microglobulin                                      |
| H7  | GAPD      | Glyceraldehyde phosphate dehydrogenase                    |
| H8  | GUSB      | Glucuronidase, beta                                       |
| H9  | HPRT1     | Hypoxanthine phosphoribosyltransferase 1                  |
| H10 | PGK1      | Phosphoglycerate kinase 1                                 |
| H11 | PPIA      | Peptidylprolyl isomerase A                                |
| H12 | RPL13A    | Ribosomal protein L13a                                    |
